# Supplementary material for: Old Acquaintances and Novel Complex Structures for the Ni(II) and Cu(II) Complexes of bis-Chelate Oxime–Amide Ligands
Source: MDPI journal article supplement (doi:10.3390/molecules29020522), 2024-01-20
Supplement: s1 [file molecules-2807321-supplementary.pdf › molecules-2807321-supplementary.pdf]

Article

# Old Acquaintances and Novel Complex Structures for the Ni(II) and Cu(II) Complexes of *bis*-Chelate Oxime-Amide Ligands

Carla Bazzicalupi, Craig Grimmer and Igor Vasyl Nikolayenko

## Supplementary Information

# Contents

## Tables

|                  |                                                                                                                                            |        |
|------------------|--------------------------------------------------------------------------------------------------------------------------------------------|--------|
| <b>Table S1.</b> | Ni(II) complexes reported in literature.                                                                                                   | ... 4  |
| <b>Table S2.</b> | Cu(II) complexes reported in literature.                                                                                                   | ... 5  |
|                  | Structure Summary                                                                                                                          | ... 6  |
| <b>Table S3.</b> | NMR coupling constants derived for the tetraphenylphosphonium cation in DMSO- <i>d</i> <sub>6</sub> solvent at 30 °C.                      | ... 7  |
| <b>Table S4.</b> | Selected values of the excited state parameters computed for the YNC core.                                                                 | ... 8  |
| <b>Table S5.</b> | Computed NBOs and their parameters for the YNC core.                                                                                       | ... 8  |
| <b>Table S6.</b> | Selected values of the excited state parameters computed for RNC.                                                                          | ... 9  |
| <b>Table S7.</b> | Computed NBOs and their parameters for RNC.                                                                                                | ... 9  |
| <b>Table S8.</b> | Comparison of the selected bond lengths (Å) and valence angles (°) for the experimental (XRD, (6)) and computed structure of the YNC core. | ... 10 |
| <b>Table S9.</b> | Comparison of the selected bond lengths (Å) and valence angles (°) for the experimental (XRD, (7)) and computed structure of RNC.          | ... 10 |

## Schemes

|                   |                                                                                                                                          |        |
|-------------------|------------------------------------------------------------------------------------------------------------------------------------------|--------|
| <b>Scheme S1.</b> | A segment of tetraphenylphosphonium cation with the labelling scheme used for the assignment of NMR coupling constants in this compound. | ... 11 |
|-------------------|------------------------------------------------------------------------------------------------------------------------------------------|--------|

## Figures

|                    |                                                                                                                                                                      |        |
|--------------------|----------------------------------------------------------------------------------------------------------------------------------------------------------------------|--------|
| <b>Figure S1.</b>  | FTIR spectrum of (1) $\equiv [\{\text{Cu(II)L1H}_{-1}\}^+(\text{OH}_2)]_2^{2+} \cdot 2\text{NO}_3^- \cdot \text{H}_2\text{O}$                                        | ... 12 |
| <b>Figure S2.</b>  | FTIR spectrum of (2) $\equiv [\{\text{Cu(II)L3H}_{-1}\}^+(\text{OH}_2)]_2^{2+} \cdot 2\text{BF}_4^- \cdot 2\text{H}_2\text{O}$ .                                     | ... 12 |
| <b>Figure S3.</b>  | FTIR spectrum of (5) $\equiv [\{\text{Li}(\text{OH}_2)_3\}^+\{\text{Cu(II)L2H}_{-3}\}^-]^0 \cdot \text{H}_2\text{O}$ .                                               | ... 13 |
| <b>Figure S4.</b>  | MS-ToF spectrum of (5).                                                                                                                                              | ... 13 |
| <b>Figure S5.</b>  | FTIR spectra of (6) $\equiv [\text{PPh}_4]^+ \cdot [\text{Ni(II)L2H}_{-3}]^- \cdot \text{H}_2\text{O}$ . <b>Top:</b> Spectrum 100. <b>Bottom:</b> Alpha II Platinum. | ... 14 |
| <b>Figure S6.</b>  | <sup>1</sup> H NMR spectrum of (6).                                                                                                                                  | ... 15 |
| <b>Figure S7.</b>  | A fragment of <sup>1</sup> H NMR spectrum for YNC representing resonances attributable to the tetraphenylphosphonium (TPP) cation.                                   | ... 15 |
| <b>Figure S8.</b>  | GCOSY NMR spectrum of (6).                                                                                                                                           | ... 16 |
| <b>Figure S9.</b>  | <sup>13</sup> C- <sup>1</sup> H NMR spectrum of (6).                                                                                                                 | ... 16 |
| <b>Figure S10.</b> | <sup>13</sup> C- <sup>1</sup> H NMR spectrum of the TPP cation in (6).                                                                                               | ... 17 |
| <b>Figure S11.</b> | DEPT-135 NMR spectrum of (6).                                                                                                                                        | ... 17 |
| <b>Figure S12.</b> | GHSQC NMR spectrum of (6).                                                                                                                                           | ... 18 |
| <b>Figure S13.</b> | GHMBC NMR spectrum of (6).                                                                                                                                           | ... 18 |
| <b>Figure S14.</b> | <sup>15</sup> N projection of GHMBC NMR spectrum of (6).                                                                                                             | ... 19 |
| <b>Figure S15.</b> | GHMBC- <sup>15</sup> N NMR spectrum of (6).                                                                                                                          | ... 15 |
| <b>Figure S16.</b> | <sup>31</sup> P NMR spectrum of (6).                                                                                                                                 | ... 20 |

|                    |                                                                                                                          |        |
|--------------------|--------------------------------------------------------------------------------------------------------------------------|--------|
| <b>Figure S17.</b> | Experimental (top) and simulated (bottom) $^1\text{H}$ spectrum of the tetraphenylphosphonium (TPP) cation.              | ... 20 |
| <b>Figure S18.</b> | MS-ToF spectrum of (6).                                                                                                  | ... 21 |
| <b>Figure S19.</b> | FTIR spectra of (7) $\equiv [\text{Ni(II)L2'H}_{-2}]^0$ .                                                                | ... 22 |
| <b>Figure S20.</b> | FTIR spectra of (8) $\equiv [\text{Ni(II)L2'H}_{-2}]^0$ .                                                                | ... 23 |
| <b>Figure S21.</b> | $^1\text{H}$ NMR spectrum of (7).                                                                                        | ... 24 |
| <b>Figure S22.</b> | GCOSY NMR spectrum of (7).                                                                                               | ... 24 |
| <b>Figure S23.</b> | $^{13}\text{C}\{-^1\text{H}\}$ NMR spectrum of (7).                                                                      | ... 25 |
| <b>Figure S24.</b> | GHSQC NMR spectrum of (7).                                                                                               | ... 25 |
| <b>Figure S25.</b> | GHMBC NMR spectrum of (7).                                                                                               | ... 26 |
| <b>Figure S26.</b> | $^{15}\text{N}$ projection of GHMBC NMR spectrum of (7).                                                                 | ... 26 |
| <b>Figure S27.</b> | GHMBC- $^{15}\text{N}$ NMR spectrum of (7).                                                                              | ... 27 |
| <b>Figure S28.</b> | MS-ToF spectrum of (7).                                                                                                  | ... 28 |
| <b>Figure S29.</b> | Computed NBOs involved in the electron transitions that account for the UV-Vis spectrum of YNC (left) and RNC (right).   | ... 29 |
| <b>Figure S30.</b> | Computed energy diagram for YNC (left) and RNC (right). Bonding and antibonding states are separated by the dashed line. | ... 30 |

## Synthesis and Characterisation

|                         |                                                                                                          |        |
|-------------------------|----------------------------------------------------------------------------------------------------------|--------|
| <b>Synthesis S1.</b>    | (1) = $[\{\text{Cu(II)L1H}_{-1}\}^+(\text{OH}_2)]_2^{2+} \cdot 2\text{NO}_3^- \cdot \text{H}_2\text{O}$  | ... 31 |
| <b>Synthesis S2.</b>    | (2) = $[\{\text{Cu(II)L3H}_{-1}\}^+(\text{OH}_2)]_2^{2+} \cdot 2\text{BF}_4^- \cdot 2\text{H}_2\text{O}$ | ... 31 |
| <b>Synthesis S3.</b>    | (3) = $[\{\text{Cu(II)L3H}_{-1}\}^+\text{Cl}^-]_2^0 \cdot 4\text{H}_2\text{O}$                           | ... 31 |
| <b>Synthesis S4.</b>    | (4) = $[\{\text{Cu(II)L3H}_{-1}\}^+\text{Cl}^-]_2^0 \cdot \text{L3} \cdot 2\text{H}_2\text{O}$           | ... 31 |
| <b>Synthesis S5.</b>    | (5) = $[\{\text{Li}(\text{OH}_2)_3\}^+\{\text{Cu(II)L2H}_{-3}\}^-]^0 \cdot \text{H}_2\text{O}$           | ... 32 |
| <b>Synthesis S6.</b>    | (6) = $[\text{PPh}_4]^+ \cdot [\text{Ni(II)L2H}_{-3}]^- \cdot \text{H}_2\text{O}$                        | ... 32 |
| <b>Synthesis S7-S8.</b> | (7)–(8) = $[\text{Ni(II)L2'H}_{-2}]^0$                                                                   | ... 33 |

## Structure Refinement

|               |                                                                                                          |        |
|---------------|----------------------------------------------------------------------------------------------------------|--------|
| <b>SR S1.</b> | (1) = $[\{\text{Cu(II)L1H}_{-1}\}^+(\text{OH}_2)]_2^{2+} \cdot 2\text{NO}_3^- \cdot \text{H}_2\text{O}$  | ... 34 |
| <b>SR S2.</b> | (2) = $[\{\text{Cu(II)L3H}_{-1}\}^+(\text{OH}_2)]_2^{2+} \cdot 2\text{BF}_4^- \cdot 2\text{H}_2\text{O}$ | ... 34 |
| <b>SR S3.</b> | (3) = $[\{\text{Cu(II)L3H}_{-1}\}^+\text{Cl}^-]_2^0 \cdot 4\text{H}_2\text{O}$                           | ... 35 |
| <b>SR S4.</b> | (4) = $[\{\text{Cu(II)L3H}_{-1}\}^+\text{Cl}^-]_2^0 \cdot \text{L3} \cdot 2\text{H}_2\text{O}$           | ... 35 |
| <b>SR S5.</b> | (5) = $[\{\text{Li}(\text{OH}_2)_3\}^+\{\text{Cu(II)L2H}_{-3}\}^-]^0 \cdot \text{H}_2\text{O}$           | ... 35 |
| <b>SR S7.</b> | (7) = $[\text{Ni(II)L2'H}_{-2}]^0$                                                                       | ... 35 |
| <b>SR S8.</b> | (8) = $[\text{Ni(II)L2'H}_{-2}]^0$                                                                       | ... 35 |

## Tables

**Table S1.** Ni(II) complexes reported in literature (numbers in square brackets are references in the main text).

| Anionic complexes: 2( $N_{ox}N_{ad}$ ) coordination mode                                                                                                                                                                   |                                                                                                                                                                                                                                                                                                                                                                                                                           |                                                                                    |
|----------------------------------------------------------------------------------------------------------------------------------------------------------------------------------------------------------------------------|---------------------------------------------------------------------------------------------------------------------------------------------------------------------------------------------------------------------------------------------------------------------------------------------------------------------------------------------------------------------------------------------------------------------------|------------------------------------------------------------------------------------|
| L1                                                                                                                                                                                                                         | L2                                                                                                                                                                                                                                                                                                                                                                                                                        | L3                                                                                 |
| $\{[Ni(II)L1H_{-3}]^{-} \cdot [Li(OH_2)_2]^{+}\}_2^0$<br>$\cdot H_2O$<br><b>[8]</b><br>JOCJUG <sup>1</sup> a neutral dimer<br>of two anionic sppm <sup>2</sup> com-<br>plexes bridged by two hy-<br>drated lithium cations | $[Ni(II)L2H_{-3}]^{-} \cdot \frac{1}{2}[Ni(II)(OH_2)_6]^{2+}$<br><b>[9]</b><br>NOXBOR sppm<br><br>$[Ni(II)L2H_{-3}]^{-} \cdot \frac{1}{2}[Ni(II)(OH_2)_2]^{2+} \cdot$<br>$2pn \cdot 2H_2O$<br><b>[13]</b><br>BICFUP sppm<br><br>$[Ni(II)L2H_{-3}]^{-} \cdot [Ni(II)(im)_4(OH_2)_2]^{2+}$<br><b>[13]</b><br>BICGAW sppm<br><br>$[Ni(II)L2H_{-3}]^{-} \cdot [PPh_4]^{+} \cdot H_2O$<br><b>[14]</b><br>XAPHAY, XAPHAY01 sppm | $[Ni(II)L3H_{-3}]^{-} \cdot [AsPh_4]^{+} \cdot H_2O$<br><b>[14]</b><br>XAPHEC sppm |

<sup>1</sup> The compounds with structures determined by XRD, with their CSD codes [39] and structural motifs.

<sup>2</sup> Sppm stands for *square-planar pseudo-macrocyclic*.

**Table S2.** Cu(II) complexes reported in literature (numbers in square brackets are references in the main text).

| Cationic complexes: 2( <i>N</i> <sub>ox</sub> <i>O</i> <sub>ad</sub> ) coordination mode                                                             |                                                                                                                                                                                                    |                                                                                                                                                                     |
|------------------------------------------------------------------------------------------------------------------------------------------------------|----------------------------------------------------------------------------------------------------------------------------------------------------------------------------------------------------|---------------------------------------------------------------------------------------------------------------------------------------------------------------------|
| L1                                                                                                                                                   | L2                                                                                                                                                                                                 | L3                                                                                                                                                                  |
| $[\{\text{Cu(II)L1H}_{-1}\}^+(\text{OH}_2)]_2^{2+} \cdot 2\text{ClO}_4^-$<br><b>[8]</b>                                                              | $[\text{Cu(II)L2H}_{-1}]_2^{2+} \cdot 2\text{NO}_3^-$<br><b>[9]</b>                                                                                                                                | $[\{\text{Cu(II)L3H}_{-1}\}^+(\text{OH}_2)]_2^{2+} \cdot 2\text{ClO}_4^- \cdot 2\text{H}_2\text{O}$<br><b>[12]</b><br>NUFSUC, NUFSUC1 sp-tp <sup>3</sup>            |
| $[\{\text{Cu(II)L1H}_{-1}\}^+(\text{MeOH})]_2^{2+} \cdot 2\text{ClO}_4^- \cdot \text{MeOH}$<br><b>[17]</b><br>KAGGUW sp-tp <sup>3</sup>              | $[\{\text{Cu(II)L2H}_{-1}\}^+(\text{ClO}_4^-)(\text{OH}_2)]_n^0$<br><b>[17]</b><br>KAGHEH en <sup>5</sup>                                                                                          |                                                                                                                                                                     |
| $[\{\text{Cu(II)L1H}_{-1}\}^+(\text{NO}_3^-)(\text{DMF})]_2^0 \cdot (\text{CH}_3)_2\text{CO}$<br><b>[17]</b><br>KAGHAD doh-tp <sup>4</sup>           | $[\{\text{Cu(II)L2H}_{-1}\}^+(\text{NO}_3^-)_2(\text{MeOH})]_2^0 \cdot \text{CHCl}_3$<br><b>[17]</b><br>KAGHIL vsp <sup>6</sup>                                                                    |                                                                                                                                                                     |
| Anionic complexes: 2( <i>N</i> <sub>ox</sub> <i>N</i> <sub>ad</sub> ) coordination mode                                                              |                                                                                                                                                                                                    |                                                                                                                                                                     |
| L2                                                                                                                                                   |                                                                                                                                                                                                    |                                                                                                                                                                     |
| $[\text{Cu(II)L2H}_{-2}]^0 \cdot \text{H}_2\text{O}$<br><b>[9]</b>                                                                                   | $[\text{Cu(II)L2H}_{-3}]^- \cdot [\text{Li}(\text{OH}_2)_4]^+ \cdot 2\text{H}_2\text{O}$<br><b>[14]</b>                                                                                            | $[\text{Cu(II)L2H}_{-3}]^- \cdot [\text{PPh}_4]^+ \cdot 4\frac{1}{2}\text{H}_2\text{O}$<br><b>[16]</b><br>XEQBIF sppm                                               |
| $[\text{Cu(II)L2H}_{-3}]^- \cdot [\text{Li}(\text{OH}_2)_4]^+ \cdot 2\text{H}_2\text{O}$<br><b>[9]</b><br>NOXBIL sppm                                | $[\text{Cu(II)L2H}_{-3}]^- \cdot [\text{PPh}_4]^+ \cdot 4\frac{1}{2}\text{H}_2\text{O}$<br><b>[14]</b>                                                                                             |                                                                                                                                                                     |
| $[\text{Cu(II)L2H}_{-3}]^- \cdot [\text{Ni(II)}(\text{phen})_3]^{2+} \cdot \text{NO}_3^- \cdot 8\text{H}_2\text{O}$<br><b>[15]</b><br>XANBET sppm    | $[\{\text{Cu(II)L2H}_{-4}\}^{2-}\{\text{Co(III)tren}\}^{3+}]^+ \cdot \text{NO}_3^- \cdot \frac{1}{4}\text{LiNO}_3 \cdot 6\frac{1}{4}\text{H}_2\text{O}$<br><b>[14]</b><br>XAPHUS spmb <sup>7</sup> | $\left\{ [\text{Cu(II)L2H}_{-3}]_2^{2-} \cdot \left[ \text{Ca}(\text{MeOH})_2(\text{OH}_2)_2 \right]^{2+} \right\}_n^0$<br><b>[18]</b><br>DUCNIZ spadn <sup>8</sup> |
| $[\text{Cu(II)L2H}_{-3}]^- \cdot \frac{1}{2}[\text{Cu(II)}(\text{im})_4(\text{OH}_2)_2]^{2+} \cdot \text{H}_2\text{O}$<br><b>[13]</b><br>BICGEA sppm |                                                                                                                                                                                                    |                                                                                                                                                                     |

<sup>3</sup> Sp-tp stands for *square-pyramidal two parallel platforms*.<sup>4</sup> Doh-tp stands for *distorted octahedral two parallel platforms*.<sup>5</sup> En stands for *extended network*; in this case second ligand bites only one of the two Cu(II) ions coordinated by the previous ligand, resulting in extended network structure.<sup>6</sup> Vsp stands for *two V-shaped platforms*.<sup>7</sup> Spmb stands for *square-planar mouth bridged*, where  $\{\text{Cu(II)L2H}_{-4}\}^{2-}$  complex anion is chelated at the oximate mouth (via two oximate oxygens) by the  $\{\text{Co(III)tren}\}^{3+}$  cation, rendering distorted octahedral coordination on the Co(III) ion.<sup>8</sup> Spadn stands for *square pyramidal anionic*  $[\text{Cu(II)L2H}_{-3}]_2^{2-}$  dimer network where each Cu(II) ion of a dimer is axially coordinated to the neighbouring ligand oximate oxygen, while Ca(II) ions, coordinated to the amide oxygens in the following fashion  $\text{>O} \rightarrow \text{Ca}^{2+} \leftarrow \text{O} =$ , are responsible for the formation of extended network.

## Structure Summary

A review of crystal structures for Ni(II) and Cu(II) complexes with ligands L1-L3 published prior to this work can be summarised as follows. For the Ni(II) complexes with all three ligands only species with the 2(N<sub>ox</sub>N<sub>ad</sub>) coordination were isolated and no coordination from the axial direction was observed in these compounds. In all cases but one, the anionic complex and bulky counter-cation were electrostatically bound in the lattice. In the remaining case [8], two anionic complexes were coordinated *via* their amide oxygens to two lithium cations, which, in turn, were bridged by two water molecules in a diamond-shaped pattern, thus forming neutral complex dimers. For the Cu(II) complexes with all three ligands species with the 2(N<sub>ox</sub>O<sub>ad</sub>) coordination were isolated. For ligands L1 and L3 only such complexes were isolated. For the ligands with an even number of methylene groups in the bridge, 2 or 4, the dimeric complex structure was that of “two parallel platforms”, where two nearly planar pseudo-macrocyclic coordination moieties were parallel to each other but at different levels. For the ligand with an odd number of methylene groups in the bridge, 3, the dimeric complex structure was “V-shaped”, where the planes of such moieties were at an angle of 65.5° to each other [17], CSD code: KAGHIL. Yet another complex structure was of a polymeric nature, where two Cu(II) centres were coordinated not by two but by three ligand chelates [17], CSD code: KAGHEH. In all cases of reliably studied complexes of this nature, there was coordination of monodentate ligands from the axial direction, either by one such ligand (H<sub>2</sub>O, MeOH, Cl<sup>−</sup>) or by a pair of ligands ({DMF, NO<sub>3</sub><sup>−</sup>}, {H<sub>2</sub>O, ClO<sub>4</sub><sup>−</sup>}, {MeOH, NO<sub>3</sub><sup>−</sup>}), rendering respectively a square-pyramidal or a distorted octahedral coordination of the Cu(II) centre. Numerous complexes with the 2(N<sub>ox</sub>N<sub>ad</sub>) coordination were isolated but only for ligand L2<sup>1</sup>. In the majority of cases the anionic complex [Cu(II)L2H<sub>−3</sub>]<sup>−</sup> and a bulky counter-cation were only electrostatically bound in the lattice. In one case [14], CSD code: XAPHUS, the fully deprotonated oximate mouth of the anionic complex was bridged by another cation, {Co(III)tren}<sup>3+</sup>. In yet another case [16], CSD code: DUCNIZ, each Cu(II) ion was found in square-pyramidal environment, due to axial coordination to the neighbouring ligand oximate oxygen, affording anionic [Cu(II)L2H<sub>−3</sub>]<sub>2</sub><sup>2−</sup> dimers. The latter, in turn, were stitched into an extended network by Ca(II) ions coordinated to amide oxygen atoms.

---

<sup>1</sup> We attribute this phenomenon to higher thermodynamic stability of the six-member coordination ring. In this case the conformation of polymethylene link resembles the “flap of an envelope” and minimises mutual repulsion of the methylene protons in addition to optimal angles of the coordination bonds. For the five- and seven-member coordination rings both of these conditions are not met and the stability of resulting complexes is reduced to the point that they were not isolated in the solid state.

**Table S3.** NMR coupling constants derived for the tetraphenylphosphonium cation in DMSO-*d*<sub>6</sub> solvent at 30 °C.

| <sup>31</sup> P – <sup>13</sup> C coupling constants                                    |                                                               |                                                               |
|-----------------------------------------------------------------------------------------|---------------------------------------------------------------|---------------------------------------------------------------|
| H <sub>A</sub> = <sup>1</sup> H at 7.97 ppm                                             | H <sub>B</sub> = H <sub>B'</sub> = <sup>1</sup> H at 7.82 ppm | H <sub>C</sub> = H <sub>C'</sub> = <sup>1</sup> H at 7.74 ppm |
| <sup>13</sup> C at 135.3 ppm from HSQC                                                  | <sup>13</sup> C at 130.4 ppm from HSQC                        | <sup>13</sup> C at 134.5 ppm from HSQC                        |
| <i>J</i> <sub>PC</sub> = 3.0 Hz from <sup>13</sup> C                                    | <i>J</i> <sub>PC</sub> = 12.8 Hz from <sup>13</sup> C         | <i>J</i> <sub>PC</sub> = 10.5 Hz from <sup>13</sup> C         |
| <sup>1</sup> H – <sup>1</sup> H and <sup>31</sup> P – <sup>1</sup> H coupling constants |                                                               |                                                               |
| Spins                                                                                   | Estimated <i>J</i> <sub>HH</sub> /Hz                          | Estimated <i>J</i> <sub>PH</sub> /Hz                          |
| CC'                                                                                     | 1.3                                                           |                                                               |
| CB = C'B'                                                                               | 8.0                                                           |                                                               |
| CB'=C'B                                                                                 | 0.7                                                           |                                                               |
| CA = C'A                                                                                | 1.1                                                           |                                                               |
| BB'                                                                                     | 1.3                                                           |                                                               |
| AB = AB'                                                                                | 7.3                                                           |                                                               |
| PA = PA'                                                                                |                                                               | 12.9                                                          |
| PB = PB'                                                                                |                                                               | 3.7                                                           |
| PC                                                                                      |                                                               | 1.9                                                           |

**Table S4.** Selected values of the excited state parameters computed for the YNC core.

| Calculation type | Calculation method                | Basis set                  | Charge | Spin                | Computed energy /au | Computed dipole moment /Debye |
|------------------|-----------------------------------|----------------------------|--------|---------------------|---------------------|-------------------------------|
| SP <sup>1</sup>  | RB3LYP                            | 6-311++G(3d,2p)            | -1     | Singlet             | -2379.38975056      | 1.8852                        |
| Excited state    | $\Delta\epsilon$ /eV <sup>2</sup> | $\lambda$ /nm <sup>3</sup> | $F^4$  | Transition orbitals |                     | Orbital coefficient           |
| n = 6            | 3.4827                            | 356.00                     | 0.1128 | 77 → 79             |                     | 0.6589                        |
|                  |                                   |                            |        | 78 → 79             |                     | -0.2094                       |
| n = 11           | 4.1008                            | 302.34                     | 0.0936 | 74 → 79             |                     | -0.1676                       |
|                  |                                   |                            |        | 75 → 79             |                     | 0.6105                        |
|                  |                                   |                            |        | 76 → 81             |                     | -0.1031                       |
|                  |                                   |                            |        | 78 → 81             |                     | 0.2240                        |

<sup>1</sup> *Single point* (energy) calculation.<sup>2</sup> Transition energy.<sup>3</sup> Wavelength of the electron transition.<sup>4</sup> Oscillator strength.**Table S5.** Computed NBOs and their parameters for the YNC core.

| Orbital number | Occupancy | Orbital type    | Centered on | Approximate character |
|----------------|-----------|-----------------|-------------|-----------------------|
| 74             | 1.8531    | LP <sup>1</sup> | O2          | $p_x^2$               |
| 75             | 1.9885    | LP              | O3          | $p_x^2$               |
| 76             | 1.9756    | LP              | Ni          | $d_{z^2}^2$           |
| 77             | 1.9730    | LP              | N2          | $p_z^2$               |
| 78 (HOMO)      | 1.9399    | LP              | N3          | $p_z^2$               |
| 79 (LUMO)      | 0.0640    | RY <sup>2</sup> | N1–C2       | $\pi^*$               |
| 80             | 0.0096    | RY <sup>*</sup> | N4–C8       | $\pi^*$               |
| 81             | 0.0045    | RY <sup>*</sup> | C3–O2       | $\pi^*$               |

<sup>1</sup> *Lone pair*.<sup>2</sup> *Rydberg* antibonding orbital.



**Table S6.** Selected values of the excited state parameters computed for RNC.

| Calculation type | Calculation method   | Basis set       | Charge | Spin                | Computed energy /au | Computed dipole moment /Debye |
|------------------|----------------------|-----------------|--------|---------------------|---------------------|-------------------------------|
| SP               | RB3LYP               | 6-311++G(3d,2p) | 0      | Singlet             | -2377.51833026      | 2.3957                        |
| Excited state    | $\Delta\epsilon$ /eV | $\lambda$ /nm   | $f$    | Transition orbitals |                     | Orbital coefficient           |
| n = 2            | 2.5774               | 492.51          | 0.0204 | 73 $\rightarrow$ 79 |                     | -0.1280                       |
|                  |                      |                 |        | 74 $\rightarrow$ 79 |                     | 0.6165                        |
|                  |                      |                 |        | 76 $\rightarrow$ 77 |                     | 0.3192                        |
| n = 3            | 2.5383               | 488.46          | 0.0341 | 74 $\rightarrow$ 77 |                     | -0.3226                       |
|                  |                      |                 |        | 76 $\rightarrow$ 77 |                     | 0.6154                        |
| n = 6            | 3.1593               | 392.44          | 0.0114 | 72 $\rightarrow$ 77 |                     | 0.1577                        |
|                  |                      |                 |        | 75 $\rightarrow$ 77 |                     | 0.4831                        |
|                  |                      |                 |        | 76 $\rightarrow$ 78 |                     | -0.4706                       |
| n = 11           | 3.8284               | 323.85          | 0.0384 | 72 $\rightarrow$ 77 |                     | 0.3740                        |
|                  |                      |                 |        | 72 $\rightarrow$ 78 |                     | 0.1656                        |
|                  |                      |                 |        | 75 $\rightarrow$ 78 |                     | 0.5555                        |

**Table S7.** Computed NBOs and their parameters for RNC.

| Orbital number | Occupancy | Orbital type    | Centered on | Approximate character |
|----------------|-----------|-----------------|-------------|-----------------------|
| 72             | 1.8153    | LP              | O2          | $p_x^2$               |
| 73             | 1.9879    | LP              | Ni          | $d_{xz}^2$            |
| 74             | 1.9764    | LP              | Ni          | $d_{yz}^2$            |
| 75             | 1.9709    | LP              | Ni          | $d_{z^2}^2$           |
| 76 (HOMO)      | 1.9380    | BD <sup>1</sup> | C5–H6       | $\pi^2$               |
| 77 (LUMO)      | 0.0481    | RY*             | N2–C4       | $\pi^*$               |
| 78             | 0.0093    | RY*             | N3–C6       | $\pi^*$               |
| 79             | 0.0042    | RY*             | N1–C2       | $\pi^*$               |

<sup>1</sup> Bonding orbital.

**Table S8.** Comparison of the selected bond lengths (Å) and valence angles (°) for the experimental (XRD, **(6)** [14]) and computed structure of the YNC core.

| XRD   |          |            |           | Computed |       |            |        |
|-------|----------|------------|-----------|----------|-------|------------|--------|
| Ni–N1 | 1.879(2) | N2–C4      | 1.462(3)  | Ni–N1    | 1.903 | N2–C4      | 1.453  |
| Ni–N4 | 1.872(1) | N3–C5      | 1.466(2)  | Ni–N4    | 1.900 | N3–C5      | 1.455  |
| Ni–N2 | 1.865(1) | C4–C9      | 1.517(3)  | Ni–N2    | 1.898 | C4–C9      | 1.527  |
| Ni–N3 | 1.869(2) | C5–C9      | 1.513(3)  | Ni–N3    | 1.883 | C5–C9      | 1.528  |
| O1–N1 | 1.361(2) |            |           | O1–N1    | 1.354 |            |        |
| O4–N4 | 1.358(2) | O1–O4      | 2.431     | O4–N4    | 1.324 | O1–O4      | 2.461  |
| C3–O2 | 1.250(2) | O1–H1      | 1.20(4)   | C3–O2    | 1.246 | O1–H1      | 1.067  |
| C6–O3 | 1.255(3) | O4···H1    | 1.24      | C6–O3    | 1.248 | O4···H1    | 1.402  |
| N1–C2 | 1.287(2) |            |           | N1–C2    | 1.283 |            |        |
| N4–C7 | 1.292(3) | N1–Ni–N2   | 83.50(7)  | N4–C7    | 1.292 | N1–Ni–N2   | 82.60  |
| C3–N2 | 1.330(2) | N4–Ni–N3   | 83.13(7)  | C3–N2    | 1.334 | N4–Ni–N3   | 83.57  |
| C6–N3 | 1.330(2) | N1–Ni–N4   | 96.72(7)  | C6–N3    | 1.339 | N1–Ni–N4   | 96.59  |
| C1–C2 | 1.488(3) | N2–Ni–N3   | 96.63(7)  | C1–C2    | 1.488 | N2–Ni–N3   | 97.23  |
| C8–C7 | 1.485(7) | N1–Ni–N3   | 179.23(7) | C8–C7    | 1.489 | N1–Ni–N3   | 179.28 |
| C2–C3 | 1.508(3) | N4–Ni–N2   | 178.50(7) | C2–C3    | 1.513 | N4–Ni–N2   | 179.02 |
| C7–C6 | 1.503(3) | O1–H1···O4 | 172.9     | C7–C6    | 1.502 | O1–H1···O4 | 170.04 |

**Table S9.** Comparison of the selected bond lengths (Å) and valence angles (°) for the experimental (XRD, **(7)**) and computed structure of RNC.

| XRD   |           |            |           | Computed |       |            |        |
|-------|-----------|------------|-----------|----------|-------|------------|--------|
| Ni N1 | 1.877(8)  | N2 C4      | 1.315(14) | Ni–N1    | 1.905 | N2–C4      | 1.322  |
| Ni N4 | 1.873(8)  | N3 C5      | 1.325(13) | Ni–N4    | 1.895 | N3–C5      | 1.321  |
| Ni N2 | 1.861(7)  | C4 C9      | 1.369(14) | Ni–N2    | 1.880 | C4–C9      | 1.387  |
| Ni N3 | 1.851(8)  | C5 C9      | 1.406(12) | Ni–N3    | 1.864 | C5–C9      | 1.398  |
| O1 N1 | 1.339(10) | C9 H10     | 0.930     | O1–N1    | 1.340 | C9–H10     | 1.078  |
| O4 N4 | 1.342(10) | O1 O4      | 2.439     | O4–N4    | 1.257 | O1–O4      | 2.486  |
| C3 O2 | 1.228(11) | O1 H1      | 1.074     | C3–O2    | 1.216 | O1–H1      | 1.049  |
| C6 O3 | 1.210(13) | O4 H1      | 1.415     | C6–O3    | 1.217 | O4···H1    | 1.449  |
| N1 C2 | 1.282(11) |            |           | N1–C2    | 1.287 |            |        |
| N4 C7 | 1.274(13) | N1 Ni N2   | 84.0(3)   | N4–C7    | 1.304 | N1–Ni–N2   | 83.00  |
| C3 N2 | 1.441(11) | N3 Ni N4   | 83.7(3)   | C3–N2    | 1.399 | N4–Ni–N3   | 83.93  |
| C6 N3 | 1.412(11) | N4 Ni N1   | 97.8(3)   | C6–N3    | 1.417 | N1–Ni–N4   | 97.85  |
| C1–C2 | 1.488(12) | N2 Ni N3   | 94.4(4)   | C1–C2    | 1.486 | N2–Ni–N3   | 95.22  |
| C8–C7 | 1.475(12) | N1 Ni N3   | 178.2(4)  | C8–C7    | 1.488 | N1–Ni–N3   | 178.33 |
| C2–C3 | 1.470(16) | N2 Ni N4   | 178.0(5)  | C2–C3    | 1.498 | N4–Ni–N2   | 179.15 |
| C7–C6 | 1.509(18) | O1–H1···O4 | 156.8     | C7–C6    | 1.473 | O1–H1···O4 | 168.35 |

## Schemes

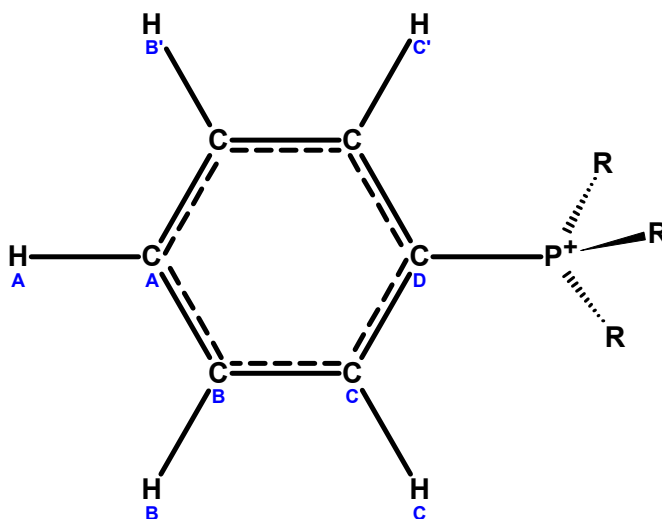

**Scheme S1.** A segment of tetraphenylphosphonium cation with the labelling scheme used for the assignment of NMR coupling constants in this compound.

## Figures

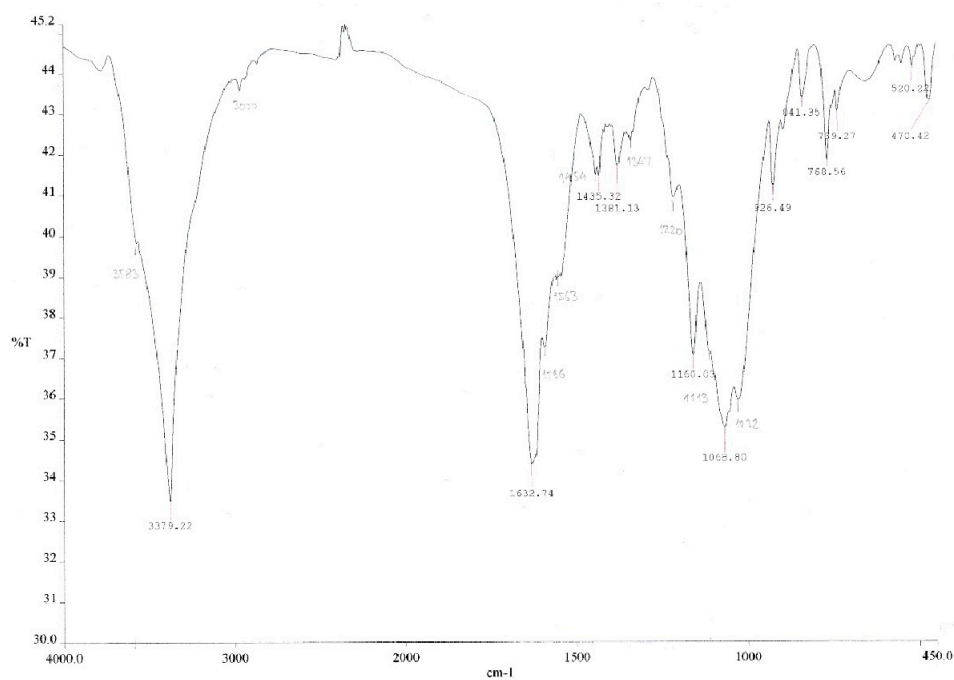

**Figure S1.** FTIR spectrum of (1)  $\equiv [\{\text{Cu(II)L1H}_{-1}\}^+(\text{OH}_2)]_2^{2+} \cdot 2\text{NO}_3^- \cdot \text{H}_2\text{O}$

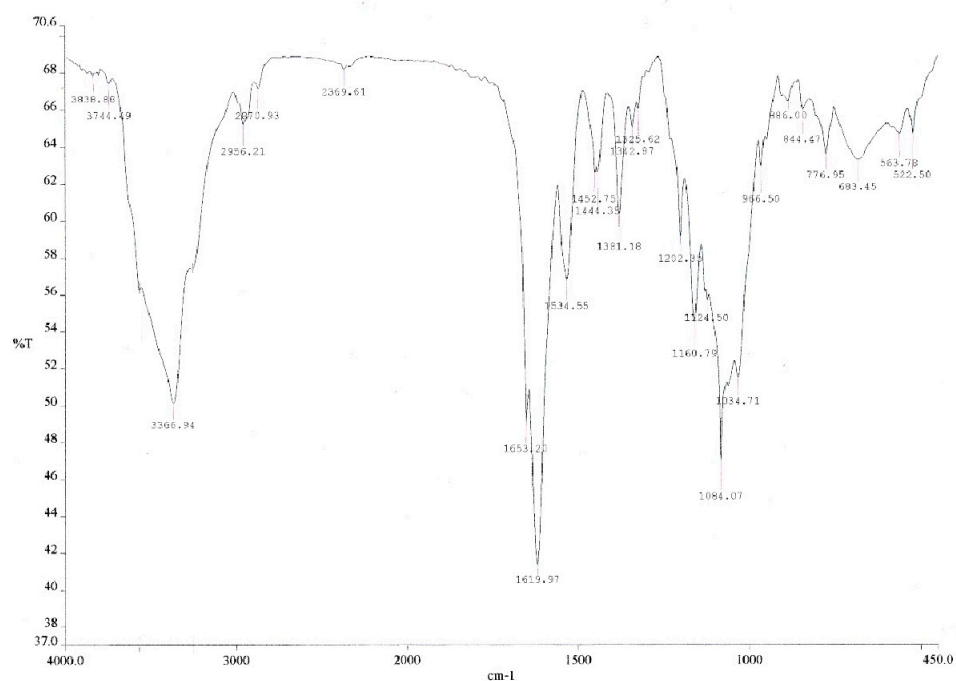

**Figure S2.** FTIR spectrum of (2)  $\equiv [\{\text{Cu(II)L3H}_{-1}\}^+(\text{OH}_2)]_2^{2+} \cdot 2\text{BF}_4^- \cdot 2\text{H}_2\text{O}$

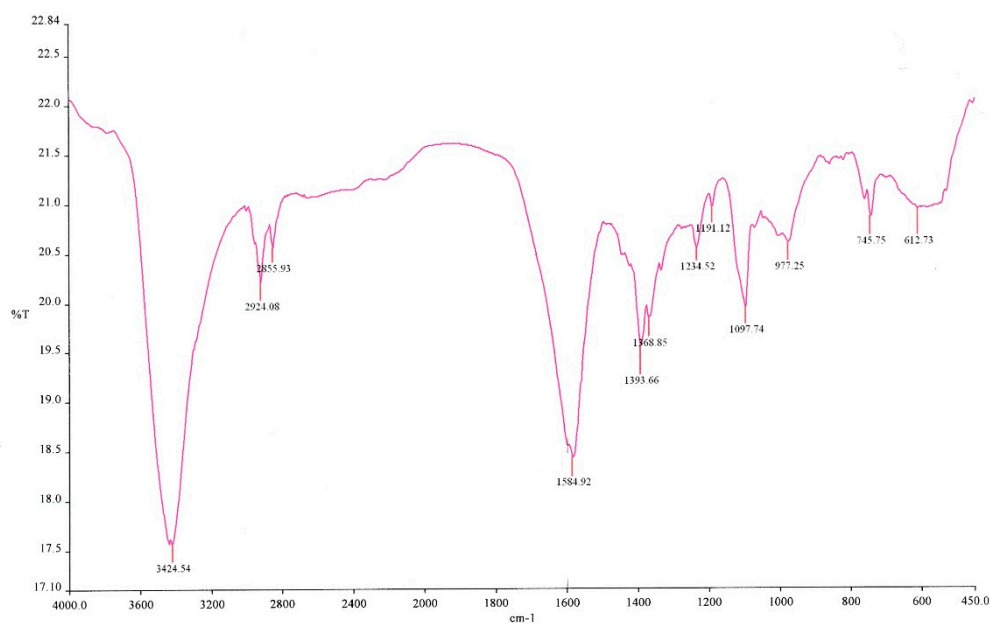

**Figure S3.** FTIR spectrum of (5)  $\equiv [\{\text{Li}(\text{OH}_2)_3\}^+\{\text{Cu}(\text{II})\text{L}_2\text{H}_{-3}\}^-]^0 \cdot \text{H}_2\text{O}$ .

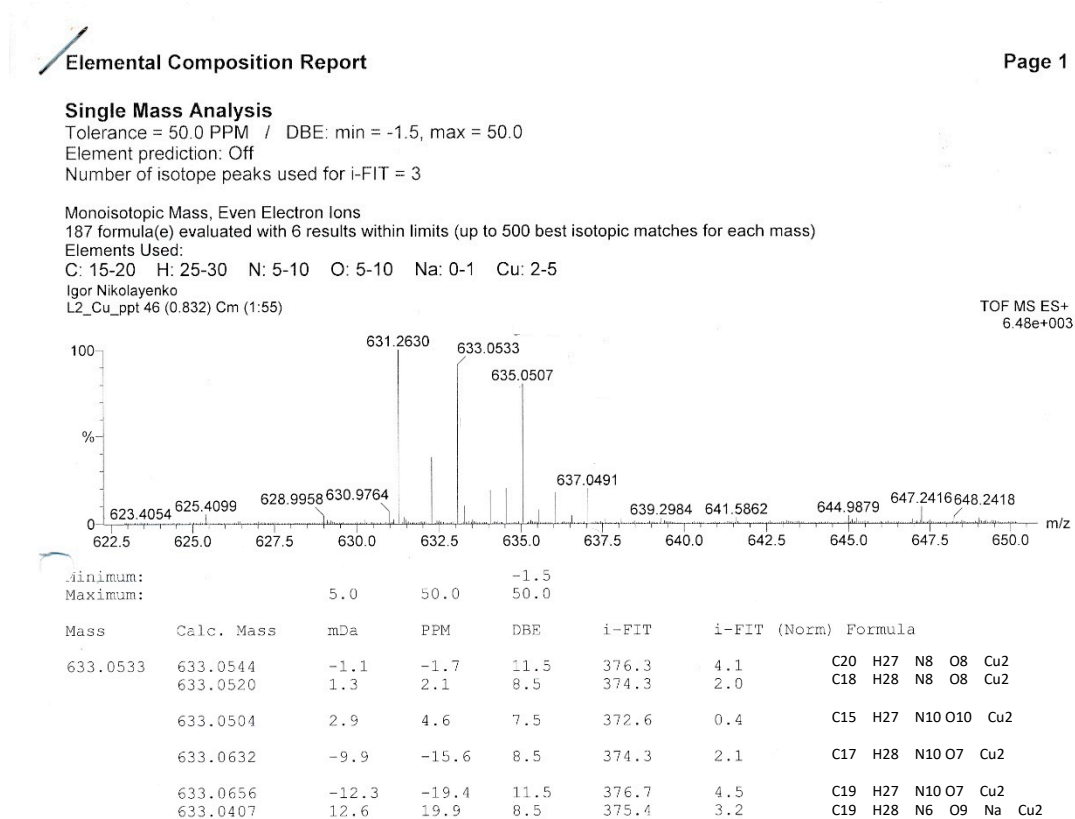

**Figure S4.** MS-ToF spectrum of (5).

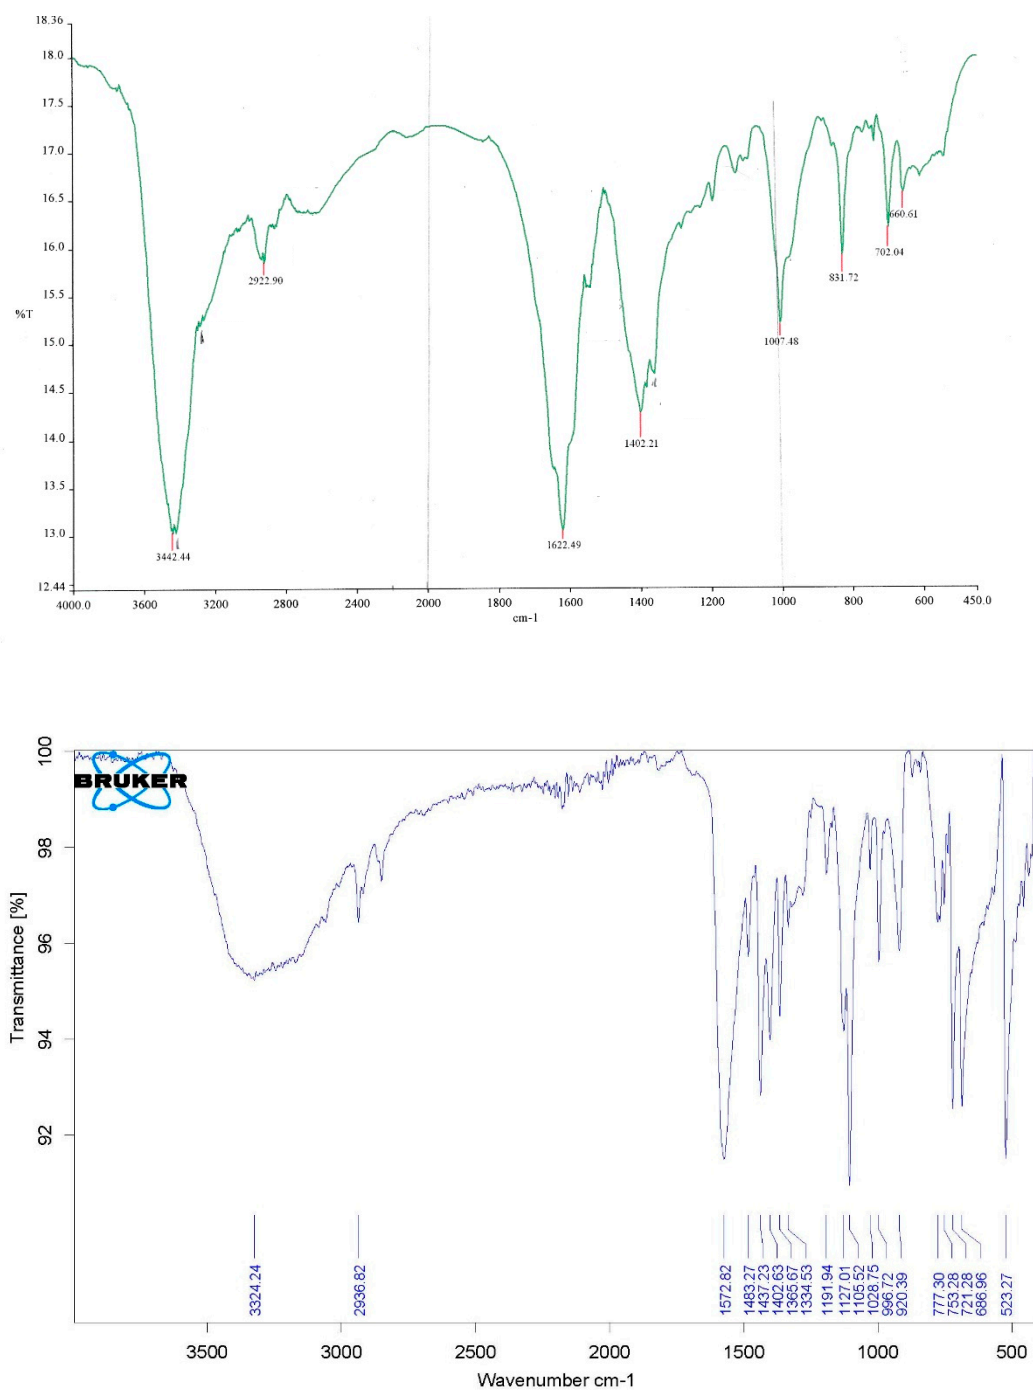

**Figure S5.** FTIR spectra of (6)  $\equiv$   $[\text{PPh}_4]^+ \cdot [\text{Ni(II)L2H}_3]^- \cdot \text{H}_2\text{O}$ . **Top:** Spectrum 100. **Bottom:** Alpha II Platinum.

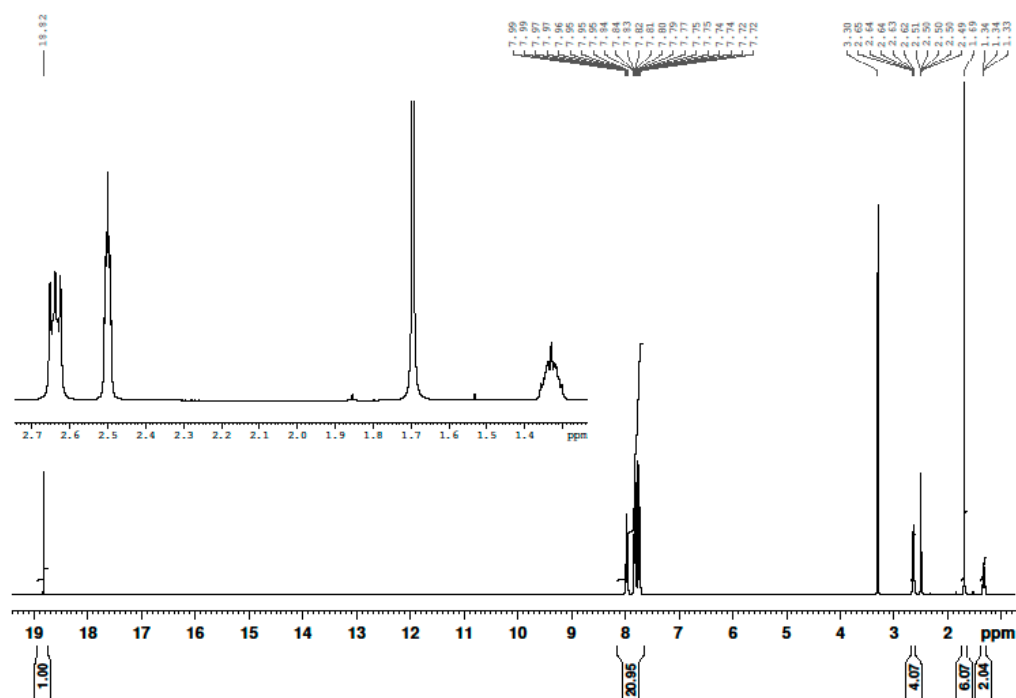

**Figure S6.**  $^1\text{H}$  NMR spectrum of (6).

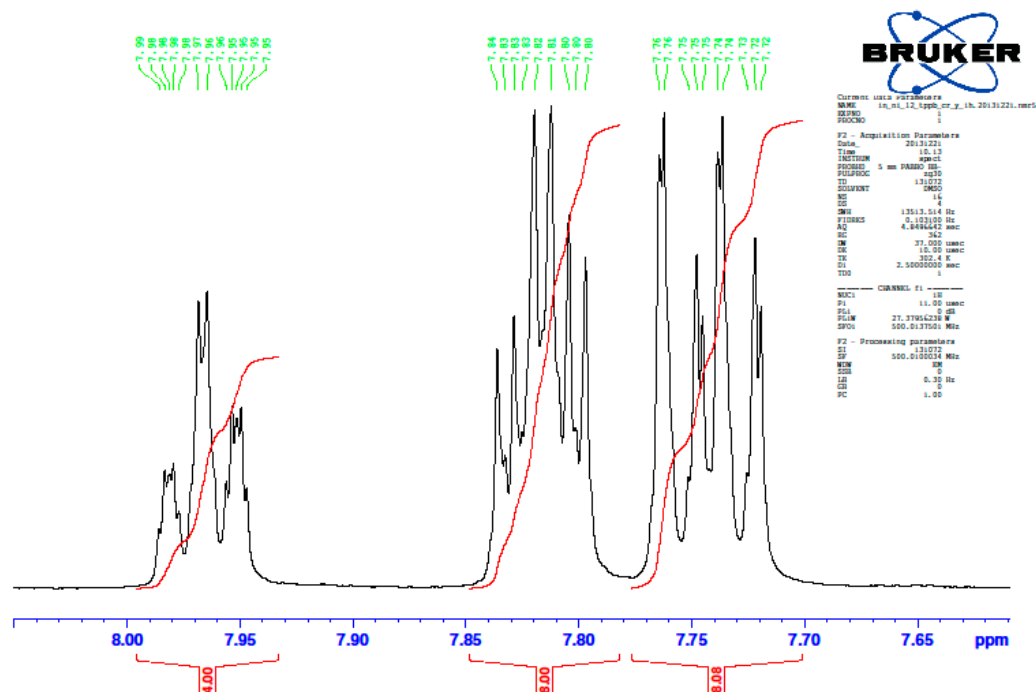

**Figure S7.** A fragment of  $^1\text{H}$  NMR spectrum for YNC representing resonances attributable to the tetraphenylphosphonium (TPP) cation.

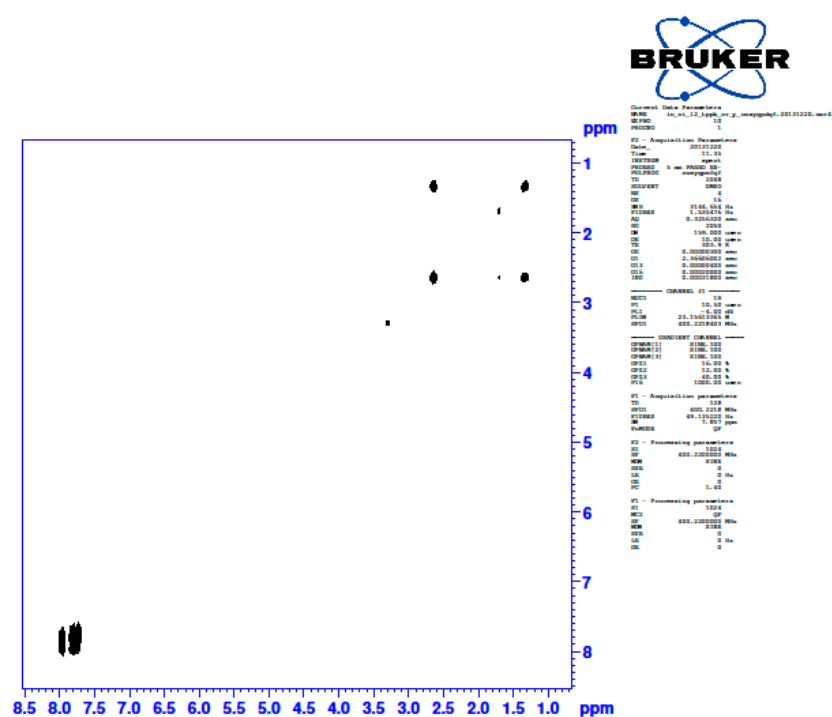

**Figure S8.** GCOSY NMR spectrum of (6).

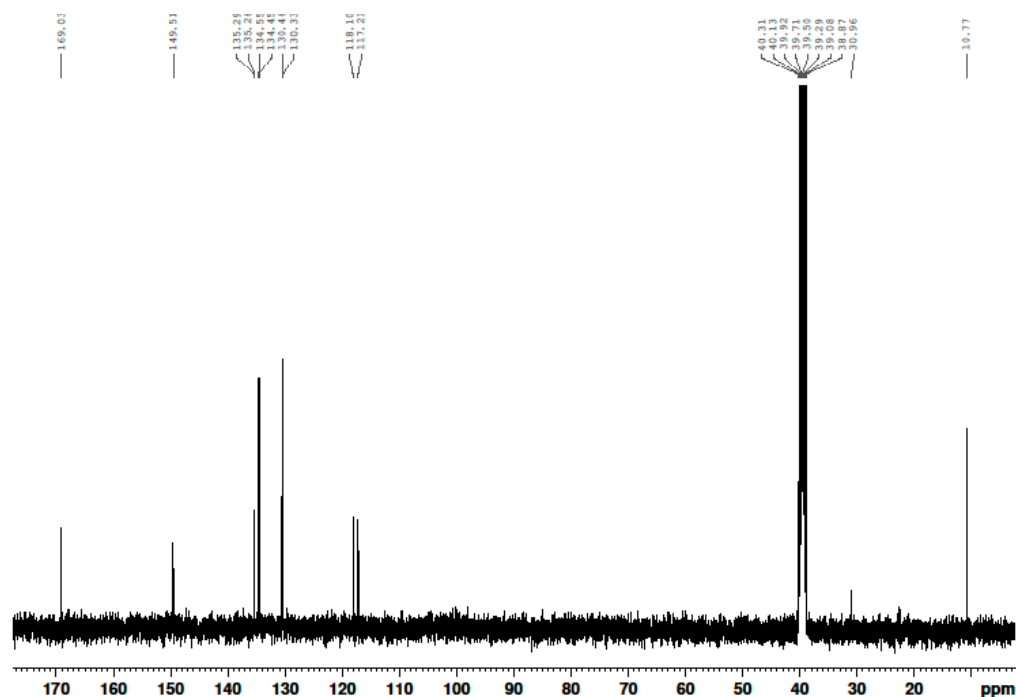

**Figure S9.**  $^{13}\text{C}\{-^1\text{H}\}$  NMR spectrum of (6).



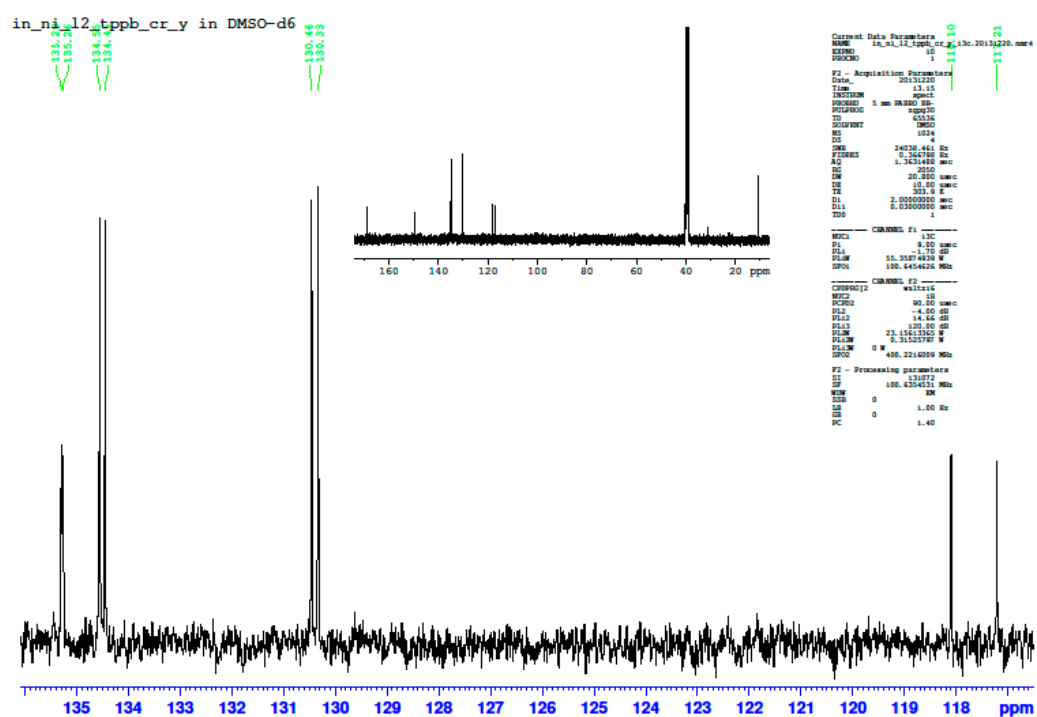

Figure S10.  $^{13}\text{C}$ - $^1\text{H}$  NMR spectrum of the TPP cation in (6).

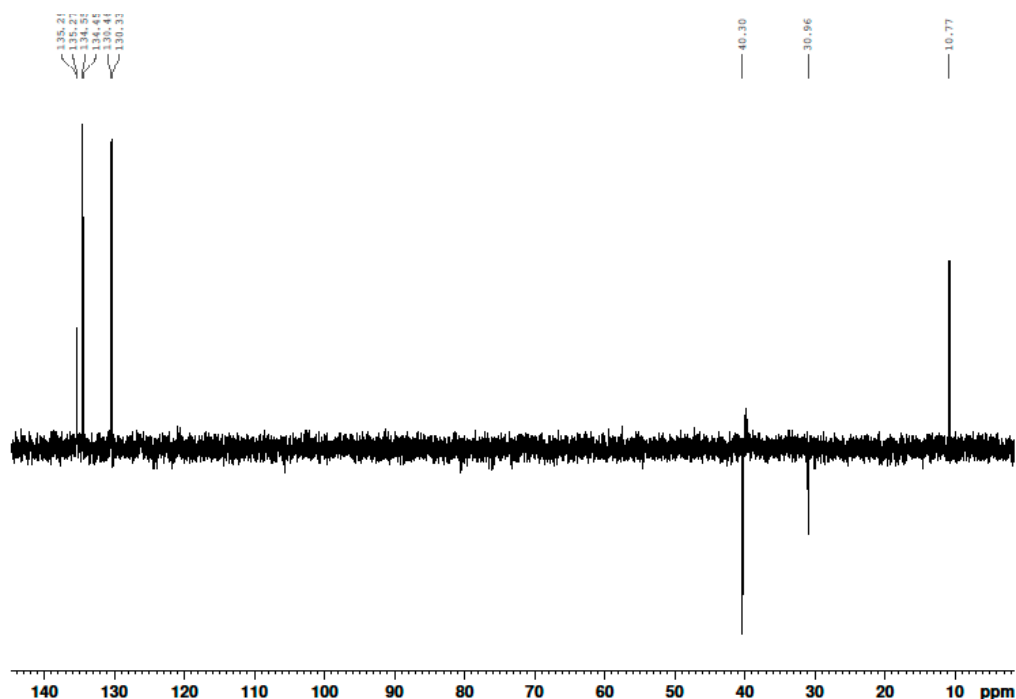

Figure S11. DEPT-135 NMR spectrum of (6).

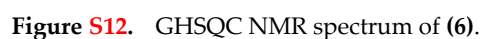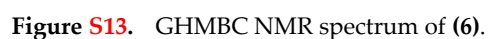

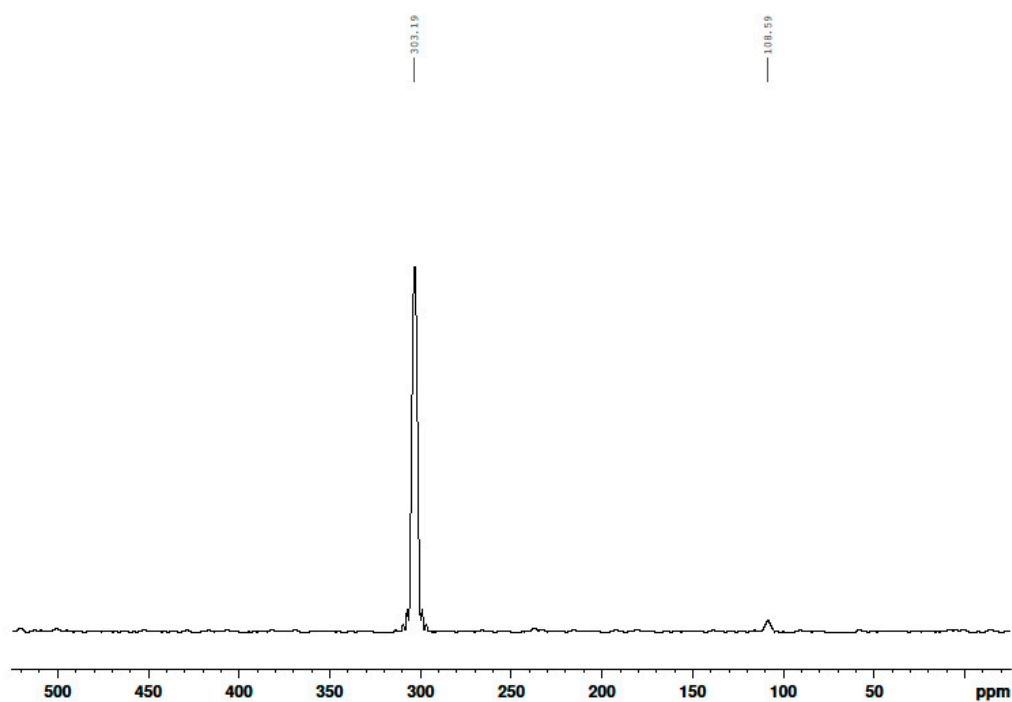

**Figure S14.** <sup>15</sup>N projection of GHMBC NMR spectrum of (6).

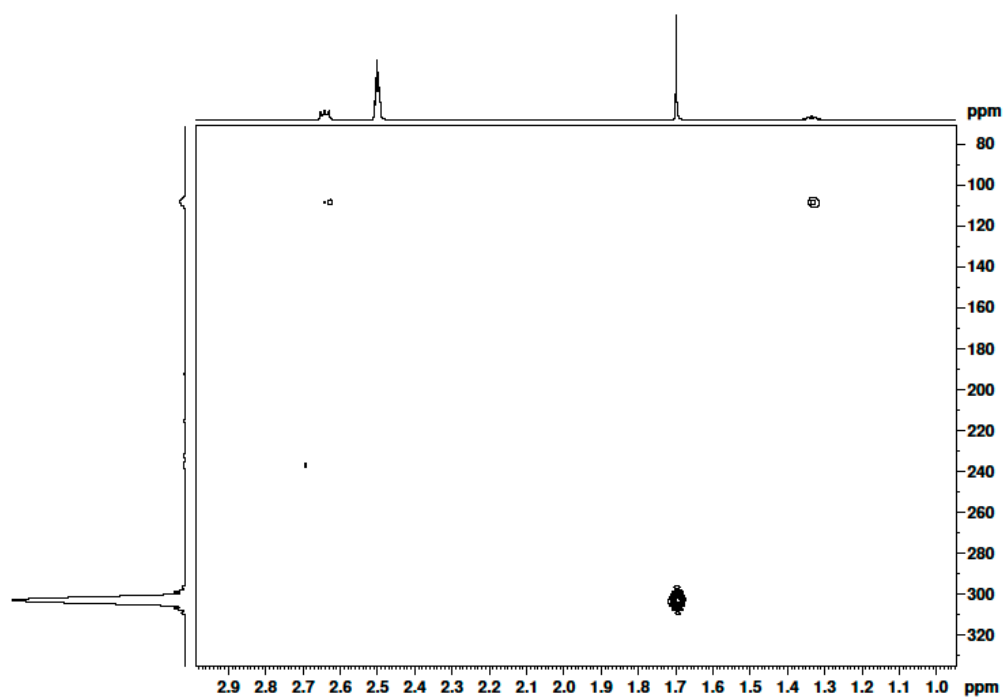

**Figure S15.** GHMBC-<sup>15</sup>N NMR spectrum of (6).

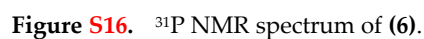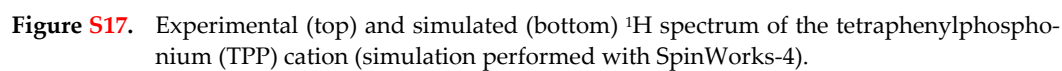

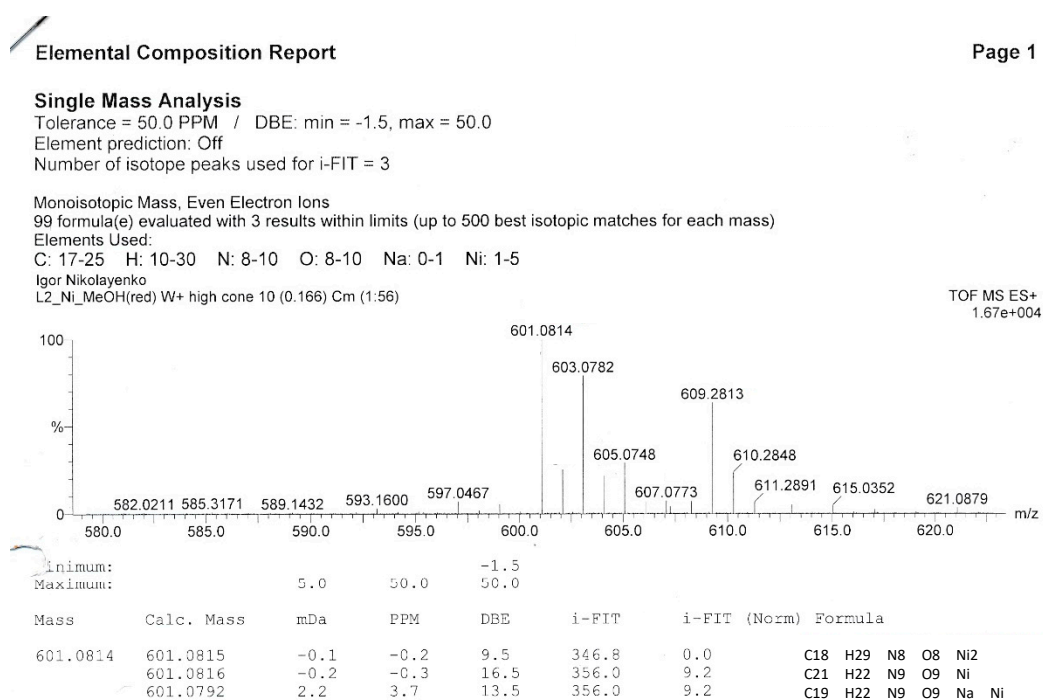

**Figure S18.** MS-ToF spectrum of (6).

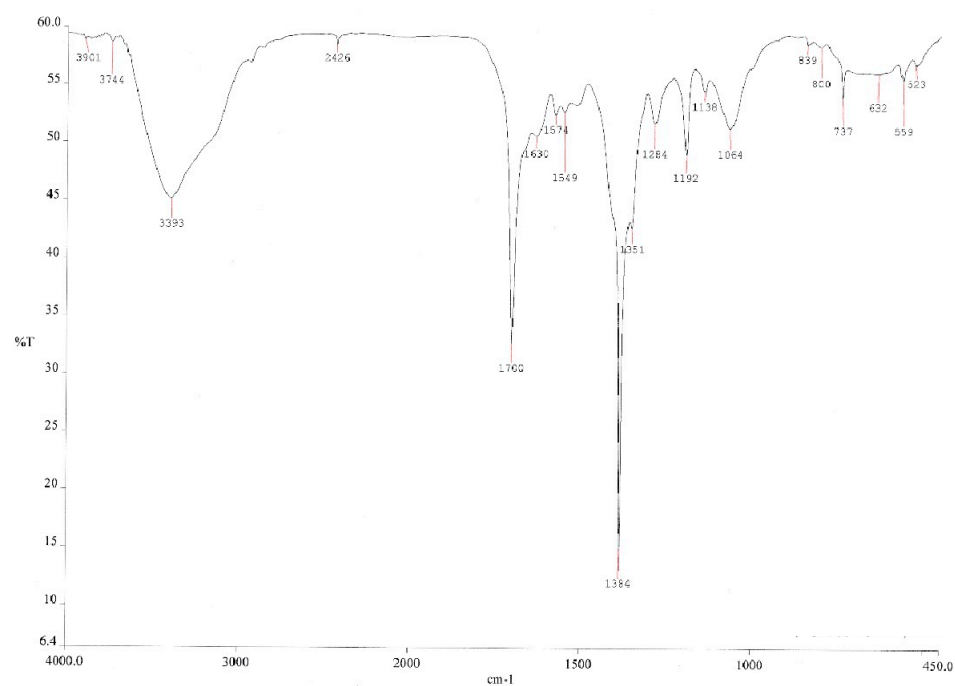

**Figure S19.** FTIR spectra of (7)  $\equiv [\text{Ni}(\text{II})\text{L2}'\text{H}_{-2}]^0$

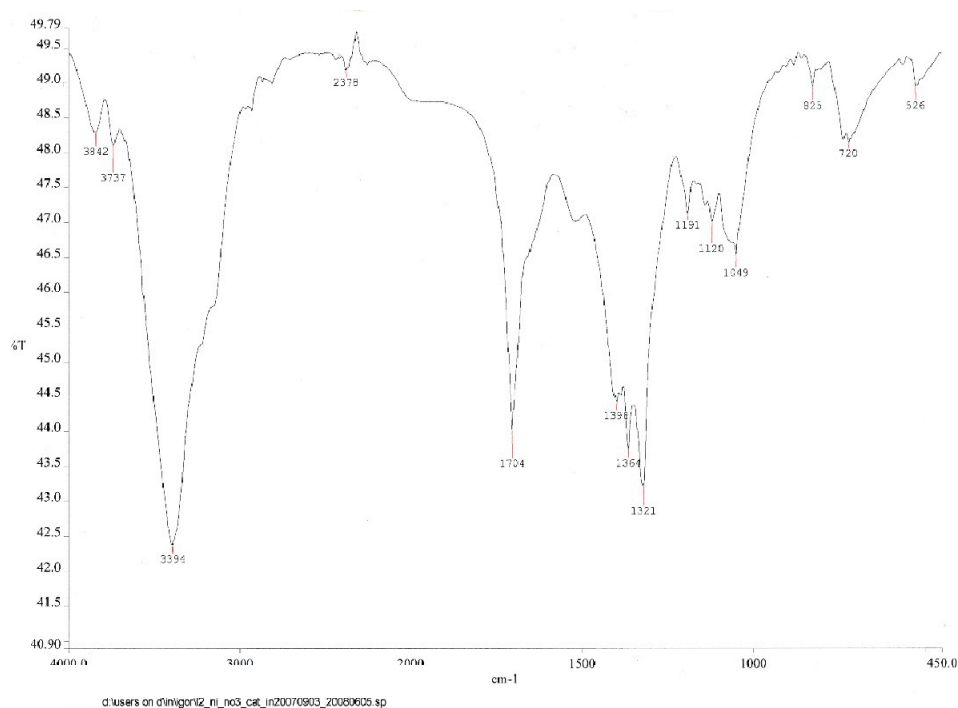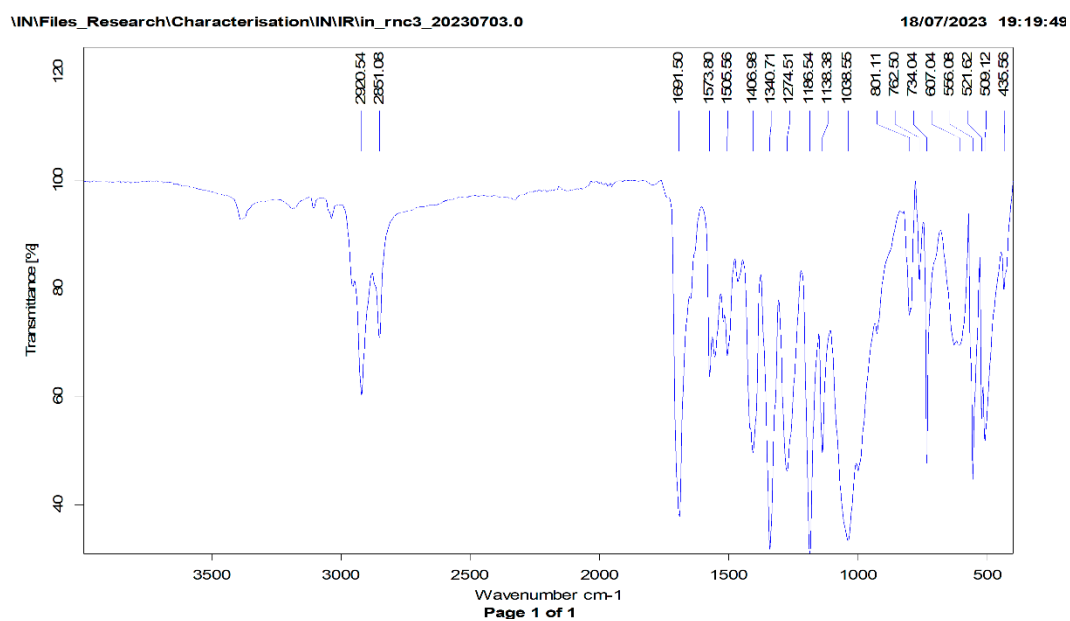

**Figure S20.** FTIR spectra of (8)  $\equiv$  [Ni(II)L2'H<sub>2</sub>]<sup>0</sup>. **Top:** Spectrum 100. **Bottom:** Alpha II Platinum.

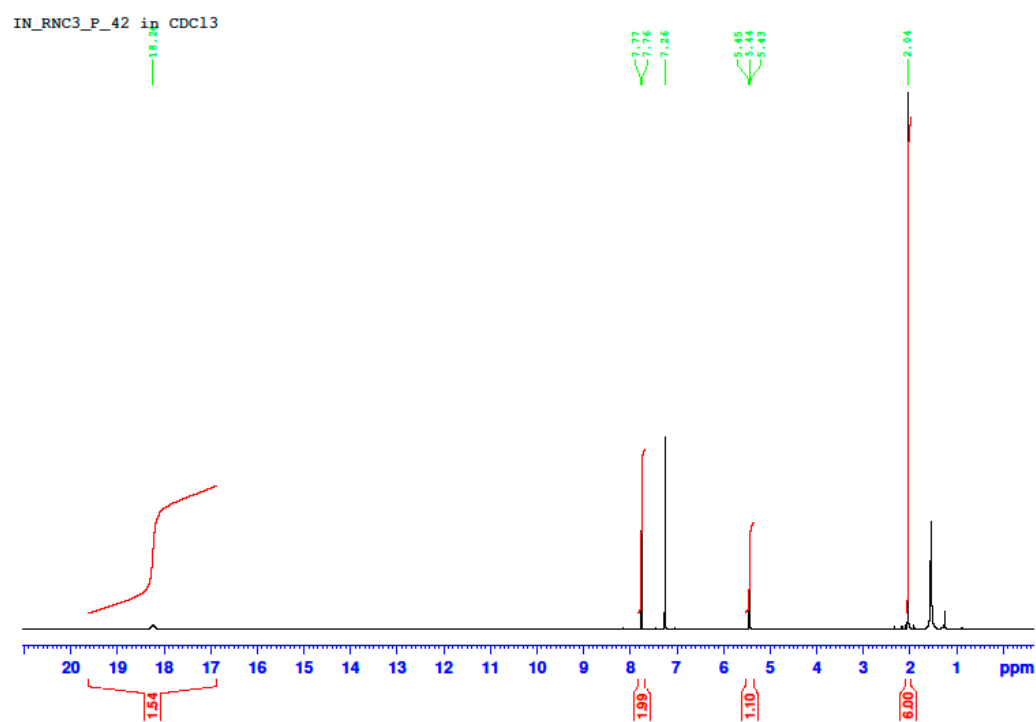

Figure S21. <sup>1</sup>H NMR spectrum of (7).

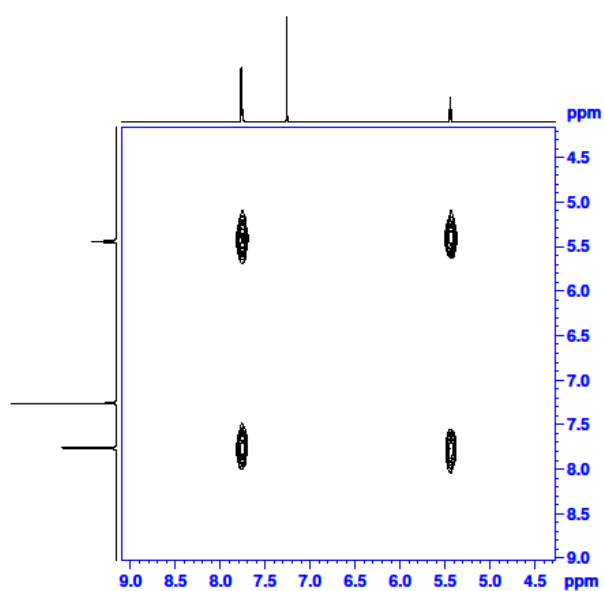

Figure S22. GCOSY NMR spectrum of (7).



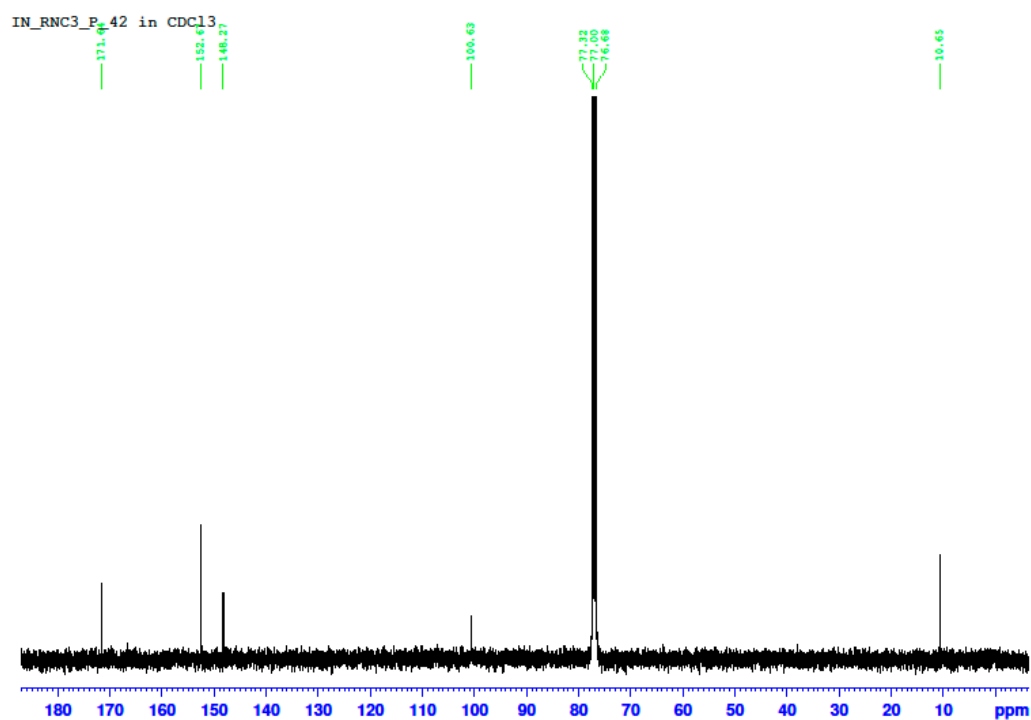

Figure S23. <sup>13</sup>C-<sup>1</sup>H NMR spectrum of (7).

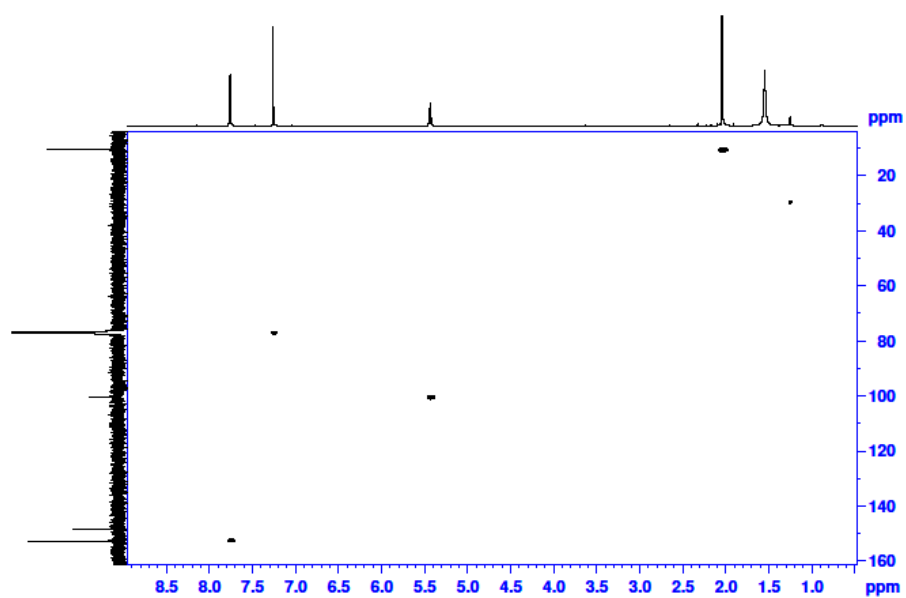

Figure S24. GHSQC NMR spectrum of (7).

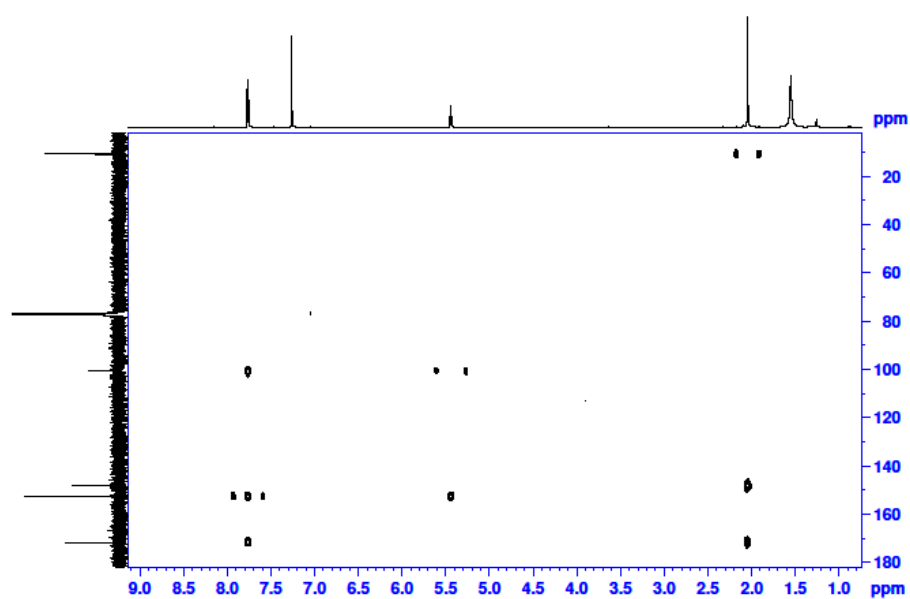

Figure S25. GHMBC NMR spectrum of (7).

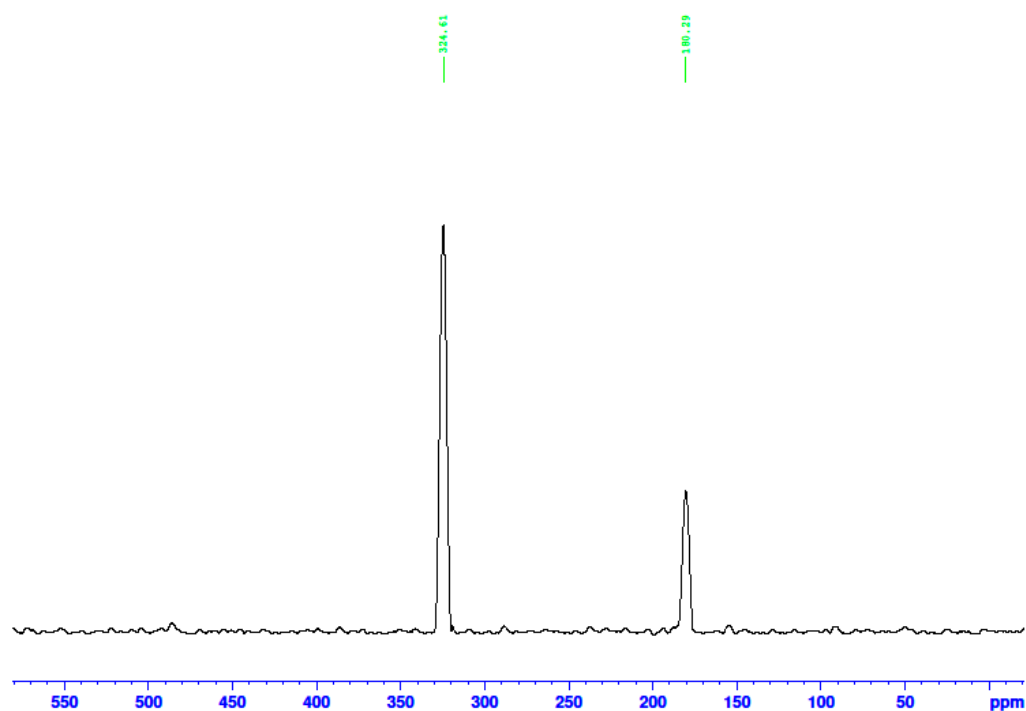

Figure S26.  $^{15}\text{N}$  projection of GHMBC NMR spectrum of (7).

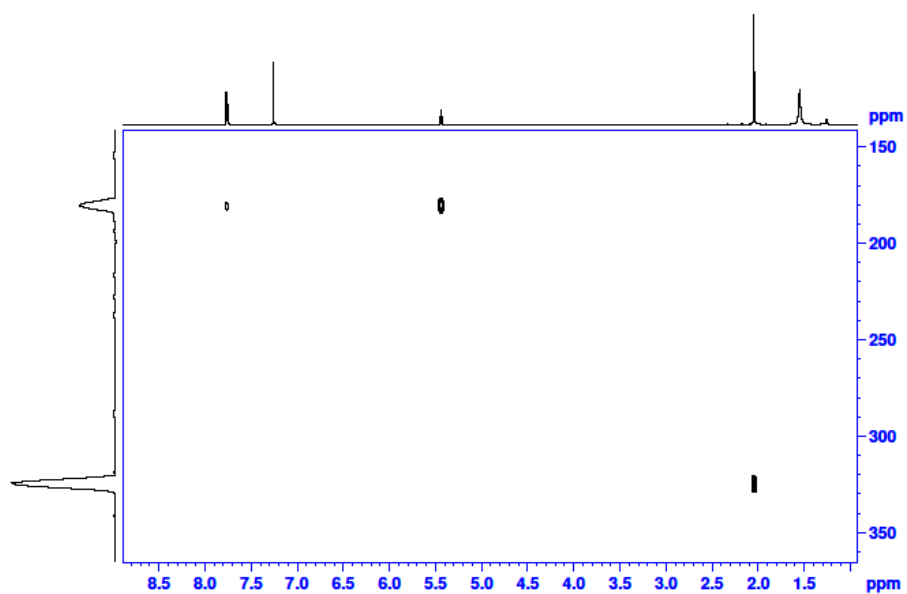

**Figure S27.** GHMBC-<sup>15</sup>N NMR spectrum of (7).

## Elemental Composition Report

Page 1

## Single Mass Analysis

Tolerance = 50.0 PPM / DBE: min = -1.5, max = 50.0

Element prediction: Off

Number of isotope peaks used for i-FIT = 3

Monoisotopic Mass, Even Electron Ions

662 formula(e) evaluated with 8 results within limits (up to 500 best isotopic matches for each mass)

Elements Used:

C: 10-20 H: 20-30 N: 0-10 O: 0-10 Na: 0-1 Ni: 0-2

Igor Nikolayenko

L2\_Ni\_stacked 4 (0.056) Cm (1:33)

TOF MS ES+  
8.24e+003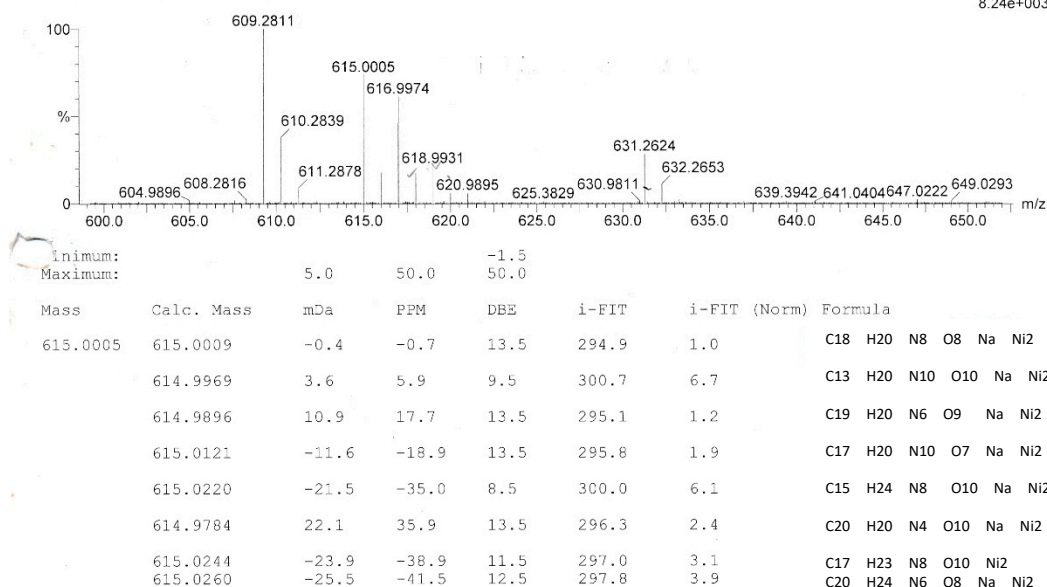

Figure S28. MS-ToF spectrum of (7).

## YNC

Orbital  
numberOrbital  
shape

81

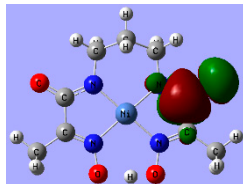

80

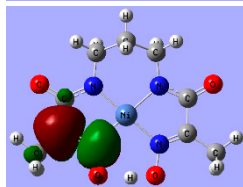

79

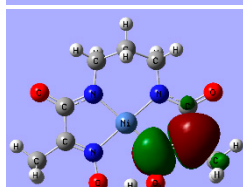

78

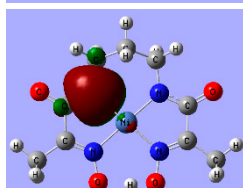

77

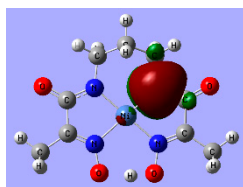

76

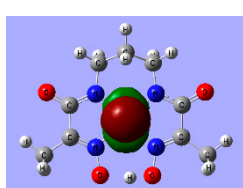

75

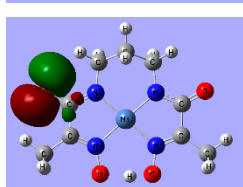

74

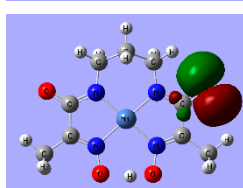

## RNC

Orbital  
numberOrbital  
shape

79

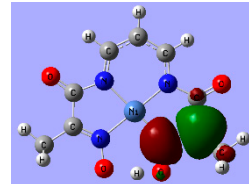

78

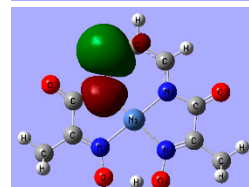

77

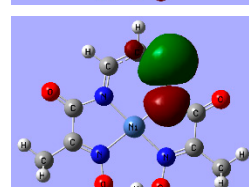

76

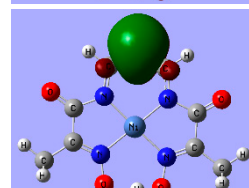

75

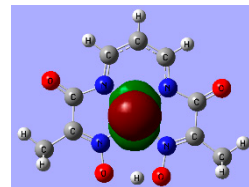

74

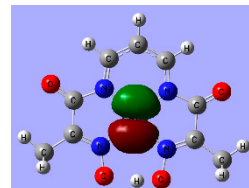

73

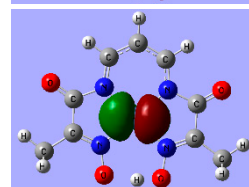

72

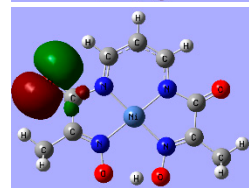

**Figure S29.** Computed NBOs involved in the electron transitions that account for the UV-Vis spectrum of YNC (left) and RNC (right).

## YNC

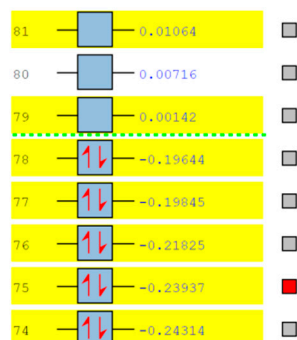

## RNC

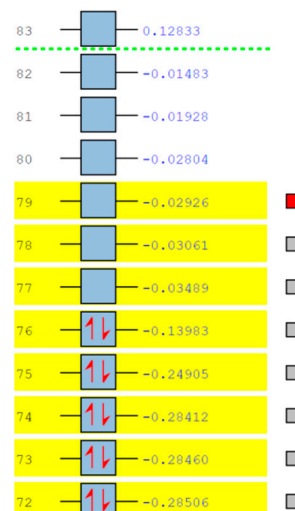

**Figure S30.** Computed energy diagram for YNC (left) and RNC (right). Bonding and antibonding states are separated by the dashed line.

## Synthesis and Characterisation

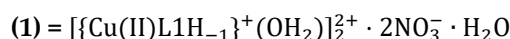

### Synthesis S1.

Ligand L1 (0.2341 g, 1.017 mmol), synthesised as previously reported (Nikolayenko, I.; Barry, J.; Chalmers, C. In Proceedings of the 37th International Conference on Coordination Chemistry, Cape Town, South Africa, 13–18 August 2006; p. 245), was dissolved in ethanol (10 mL) followed by the addition of 0.22  $\mu\text{L}$  of  $\text{HNO}_3$ (aq, 70 %).  $\text{Cu}(\text{NO}_3)_2 \cdot 2\frac{1}{2}\text{H}_2\text{O}$  (0.2326 g, 1.000 mmol) was dissolved in water (10 mL) followed by the addition of the same amount of nitric acid. The second solution was added dropwise with stirring to the hot acidified ligand mixture, which afforded dark-green solution. The latter was placed in a Petrie dish and allowed to evaporate. Well-shaped dark-green prismatic crystals that formed were picked by hand, dried, and used for the X-ray diffraction. (SI: Figure S1, Data S1).

**FTIR** (KBr, /  $\text{cm}^{-1}$ ): 3583 (s, N–H), 3379 (br, O–H), 3000 (C–H), 1633 (s, C=N), 1596 (s, C=O), 1563 (s, C(=O)–N), 1454, 1435, 1381, 1347, 1220, 1160, 1113, 1067 (s, N–O), 1032 (s, N–O), 926, 841, 766, 739.

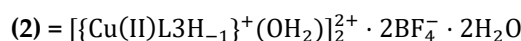

### Synthesis S2.

To ligand L3 (0.0755 g, 0.2865 mmol), synthesised as previously reported (Nikolayenko, I.; Barry, J.; Chalmers, C. In Proceedings of the 37th International Conference on Coordination Chemistry, Cape Town, South Africa, 13–18 August 2006; p. 245), was added deionised water (7.5 mL) and the mixture heated with stirring. Aqueous  $\text{Cu}(\text{BF}_4)_2$  (0.1000 M, 2,565  $\mu\text{L}$ , 0.2565 mmol) was added. The resulting blue solution was boiled with stirring for 15 min, upon which the pH was adjusted to the desired value of 4 by dropwise addition of aqueous LiOH (0.5005 M) and  $\text{HBF}_4$  (1.000 M). The solution of deep-blue colour, was filtered and mother liquor set aside for crystallisation. The dark-green prismatic crystals that formed were picked by hand, dried, and used for characterisation. (SI: Figure S2, Data S2).

**FTIR** (KBr, /  $\text{cm}^{-1}$ ): 3570 (N–H), 3367 (s, O–H<sub>w</sub>), 3255, 2956, 2871 (C–H), 1653 (s, C=N), 1620 (s, C=O), 1535 (s, C(=O)–N), 1453, 1444, 1381, 1343, 1202, 1160, 1125, 1084 (s, B–F), 1035 (s, N–O), 967, 844, 777, 683, 564, 523.

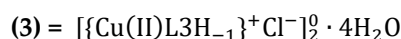

### Synthesis S3.

A series of samples with the target volume between 5.0 mL and 5.5 mL were prepared in sealed glass vials from the following aqueous solutions:  $[\text{L3}]_0 = 4.999 \text{ mM}$  in EtOH(abs),  $[\text{HCl}]_0 = 0.1987 \text{ M}$ ,  $[\text{CuCl}_2]_0 = 0.1942 \text{ M}$  in HCl(aq, 1 mM),  $[\text{KOH}]_0 = 0.1036 \text{ M}$  and one of the bulky counterion salts,  $[\text{TPPB}]_0 = 49.94 \text{ mM}$ ,  $[\text{PHFP}]_0 = 50.05 \text{ mM}$ ,  $[\text{PHFA}]_0 = 50.00 \text{ mM}$  (where TPPB = tetraphenylphosphonium bromide, PHFP = potassium hexafluorophosphate, and PHFA = potassium hexafluoroarsenate). The target concentrations of the ingredients in the final solution were 1.0 mM for [L3], 1.0 mM or 2.0 mM for  $[\text{Cu}^{2+}]$ , 1.0 mM for [HCl], and 1.0 mM or 2.0 mM [counterion]. The balance of the volume was made up with deionised water and variable amount of aqueous potassium hydroxide to reach the desired pH value in the range 4.8 to 10.3. In a particular experiment, to 1000  $\mu\text{L}$  of the ligand solution was added 3949  $\mu\text{L}$  of water, followed by 25.5  $\mu\text{L}$  of hydrochloric acid, 25.7  $\mu\text{L}$  of aqueous copper(II) chloride and 40.81  $\mu\text{L}$  of aqueous potassium hydroxide to reach the target pH value of 7.5. In this particular case, no solution of bulky counterion salt was added. The prepared mixture was stirred overnight and left for slow solvent evaporation (the vial was sealed with a plastic lid that had a pin-hole in it). After sufficient time a mixture of solid products precipitated out of solution. Well-formed dark-green prismatic crystals were picked by hand, dried, and subjected to further examination.

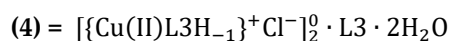

### Synthesis S4.

In a procedure similar to the above but with different quantities of water and potassium hydroxide (the target *pH* value of 8.6) complex (4) was isolated.

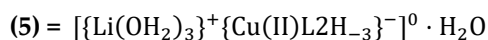

#### Synthesis S5.

To ligand L2 (0.1218 g, 0.4887 mmol), synthesised as described in [1], was added aqueous LiOH (0.5005 M, 2×2,500 µL, 2.503 mmol) and the mixture stirred until dissolution. Aqueous Cu(BF<sub>4</sub>)<sub>2</sub> (0.1000 M, 2×2,500 µL, 0.5000 mmol) was added, which caused instantaneous formation of wine-red solution. The latter was heated on a water bath, filtered, and the mother liquor allowed to evaporate. The resulting solid residue was re-dissolved in hot MeOH (20 mL), the remaining solid filtered off under vacuum, and the mother liquor left to evaporate. The needle-like red crystals that formed were picked by hand, dried, and used for characterisation. (SI: Figures S3–S4, Data S3–S6).

**CHN:** Calcd. for C<sub>9</sub>H<sub>21</sub>N<sub>4</sub>O<sub>8</sub>CuLi (383.7727): C, 28.17; H, 5.52; N, 14.60. Found (UniFi): C, 28.70; H, 4.58; N, 14.12.

**FTIR** (KBr, / cm<sup>−1</sup>): 3425 (br, O–H<sub>w</sub>), 2924, 2856 (CH), 1598 (s, C=N), 1585 (s, C=O), 1394 (s, C(=O)–N), 1369, 1235, 1191, 1098 (s, N–O), 977, 746, 703, 530.

**<sup>1</sup>H NMR** (DMSO-d<sub>6</sub>, δ/ ppm): NMR spectrum of this complex shows strong paramagnetic broadening, which prevented assignment of resonance signals.

**MS-ToF** [ES<sup>+</sup>] *m/z*(%): Calculated for C<sub>18</sub>H<sub>28</sub>N<sub>8</sub>O<sub>8</sub><sup>63</sup>Cu<sub>2</sub>Na ≡ [M<sub>2</sub>Na]<sup>+</sup> 633.0520; found 633.0533 (92); δ +2.1. Calculated for C<sub>18</sub>H<sub>28</sub>N<sub>8</sub>O<sub>8</sub><sup>63</sup>Cu<sup>65</sup>CuNa ≡ [MM'Na]<sup>+</sup> 635.0500; found 633.0507 (81); δ +1.1. Calculated for C<sub>18</sub>H<sub>28</sub>N<sub>8</sub>O<sub>8</sub><sup>65</sup>Cu<sub>2</sub>Na ≡ [M'<sub>2</sub>Na]<sup>+</sup> 637.0482; found 637.0491 (23); δ +1.4.

Mass-spectroscopic data indicate that this complex is present in the gas phase as a mono-cationic dimer, where the charge is provided by the inclusion of a sodium cation.<sup>2</sup> Satisfactory composition was observed in the spectrum for <sup>63</sup>Cu and <sup>65</sup>Cu isotopes. It is worth noting that no such spectra were obtained for similar complexes with L1 and L3, where fragmentation of the complexes was observed. This serves as further confirmation of higher thermodynamic stability of the pseudomacrocyclic complex anion with propane link.

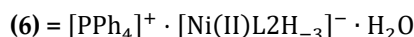

#### Synthesis S6.

To a hot solution of ligand L2 (0.5002 g, 2.007 mmol) in water (25 mL) was added with stirring a solution of Ni(NO<sub>3</sub>)<sub>2</sub>·6H<sub>2</sub>O (0.6115 g, 2.103 mmol) in water (20 mL), which afforded a yellow solution with a green hue. Further addition of aqueous KOH (0.5 M × 12.6 mL, 6.3 mmol) deepened the yellow colour to amber. The mixture was left stirring at 80 °C for 1 hour. Tetraphenylphosphonium bromide, [PPh<sub>4</sub>]Br, (0.8678 g, 2.008 mmol) was dissolved in a water-methanol (18 ml : 2 ml) mixture and added to the hot complex solution, which caused instantaneous precipitation of pale-yellow powder. The reaction mixture was cooled and left stirring overnight at room temperature. The mixture consisting of pale-yellow powdery precipitate and orange-yellow solution was brought to the boil and the solid phase removed by filtration. A bright-yellow powder (1.050 g), (6), was air-dried. The mother liquor was placed in a Petrie dish and allowed to evaporate. The well-shaped yellow prismatic crystals that formed were filtered off and left to dry in the air (0.195 g). These crystals were also identified as (6). XRD analysis revealed that the complex isolated had the same crystal structure as reported in [14].

**Combined yield:** 1.245 g, 97.0 %.

**FTIR** ( $\bar{\nu}$  / cm<sup>−1</sup>): 3442 (s, O–H<sub>w</sub>), 3297, 2923, 2716, 2652 (C–H), 1692, 1647 (s, C=N), 1622 (s, C=O), 1585 (s, C=N), 1524, 1402 (s, C(=O)–N), 1352, 1176, 1107 (N–O), 958 (N–O), 832, 702, 661.

<sup>2</sup> Sodium cations are often responsible for the charge of molecular ions. Their source is the glassware used for handling the sample solution being nebulised by means of electrospray ionisation.



**NMR:** For this complex we have recorded  $^1\text{H}$ ,  $^{13}\text{C}$ , dept135,  $^{15}\text{N}$ ,  $^{31}\text{P}$ , COSY, HSQC, HMBC ( $^1\text{H}$ - $^{13}\text{C}$ ), and HMBC ( $^1\text{H}$ - $^{15}\text{N}$ ) spectra, SI: Figures S6-S16, which allowed the following assignment of chemical shifts.

*Ni(II)-complex anion:*

$^1\text{H}$  (DMSO- $d_6$ ,  $\delta$  / ppm): 1.335 (m, 2H,  $\text{CH}_2\text{CH}_2\text{CH}_2$ ), 1.698 (s, 6H,  $\text{CH}_3$ ), 2.641 (m, 4H,  $\text{NCH}_2$ ), 18.816 (s, 1H,  $\text{O}\cdots\text{H}-\text{O}$ ).

$^{13}\text{C}$  (DMSO- $d_6$ ,  $\delta$  / ppm): 10.77 (t,  $\text{CH}_3$ ), 30.96 (t,  $\text{CH}_2\text{CH}_2\text{CH}_2$ ), 40.31 (t,  $\text{NCH}_2$ ), 149.51 (s,  $\text{C}(=\text{NOH})$ ), 169.03 (s,  $\text{C}(=\text{O})$ ).

$^{15}\text{N}$  (DMSO- $d_6$ ,  $\delta$  / ppm): 108.59 (s,  $\text{C}(=\text{O})-\text{N}$ ), 303.19 (s,  $\text{C}(=\text{NOH})$ ).

*Tetraphenylphosphonium cation:*

$^1\text{H}$  (DMSO- $d_6$ ,  $\delta$  / ppm): 7.713-7.753, 7.734-7.769 (m, 8H,  $\text{H}_\text{A}$ ,  $\text{H}_\text{A}'$ ), 7.792-7.784 (m, 8H,  $\text{H}_\text{B}$ ,  $\text{H}_\text{B}'$ ), 7.942-7.991 (m, 4H,  $\text{H}_\text{C}$ ).

$^{31}\text{P}$  (DMSO- $d_6$ ,  $\delta$  / ppm): 22.32 (m, ).

On the basis of experimental  $^1\text{H}$ ,  $^{13}\text{C}$ , and HSQC spectra, an NMR spectral simulation was performed, which quantitatively reproduced the complex multiplets in the  $^1\text{H}$  spectrum for the TPP cation, SI: Figure S17, and thus allowed to evaluate various nuclei correlations and the H-H, C-H, and P-C coupling constants for this ion, SI: Scheme S1, Table S3.

**MS-ToF** [ES $^+$ ] **m/z**: Calculated for  $\text{C}_{18}\text{H}_{29}\text{N}_8\text{O}_8^{58}\text{Ni}_2 \equiv [\text{M}_2\text{H}]^+ 601.0815$ ; found 601.0814;  $\delta$  -0.2 ppm. Recording this signal required high cone voltage of 16.7 kV. The detected molecular ion was a monohydrogen cation of the neutral Ni(II) complex dimer of ligand L2. The isotopic composition in the mass-spectrum was as expected for nickel.

Besides (6), other anionic Ni(II)-complexes with ligand L2 and solvated  $\text{Li}^+$ ,  $\text{K}^+$  and  $\text{Ni}^{2+}$  in the role of counter-cation have been isolated. The NMR spectra of these compounds in DMSO- $d_6$  revealed virtual identity (within experimental errors) of the chemical shifts of the complex anion with those recorded for (6), which indicated high degree of stability of the complex anion in solution.

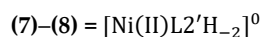

Polymorphs (7) and (8) co-crystallised from the reaction mixture and the different crystals were picked by hand for the diffraction and other analyses.

### Synthesis S7-S8.

**Route A:** To a solution of ligand L2 (1.2474 g, 5.00 mmol) in dry methanol (100 mL) was added a solution of  $\text{Ni}(\text{NO}_3)_2 \cdot 6\text{H}_2\text{O}$  (1.5330 g, 5.57 mmol) in dry methanol (80 mL) and the obtained mixture left stirring for 30 min at room temperature, during which time the solution remained salad-green in colour. KOH (aq, 1.0 M  $\times$  10 mL, 10 mmol) was added dropwise, which caused a rapid colour change from avocado-green to mustard, and the last 2.5 mL brought about ample precipitation. The resulting solution was brought to the boil and refluxed for 30 min. After about 15 min the colour changed to warm yellow, and by the end of reflux the precipitate has completely dissolved, leaving clear tea-coloured solution.  $\text{H}_2\text{O}_2$  (aq $^3$ , 2.554 mL, 25.00 mmol) was added with no visible change observed. The solution was left stirring in a stoppered flask for two months. The resulting mixture contained substantial amount of red and yellow precipitate in orange-red liquor. The primary precipitate was filtered off and dried on a watch glass to produce scarlet powder (0.404 g). Under the microscope one could see that it consisted of some unreacted L2, yellow complex (6), and new red nickel complex. This conclusion was confirmed by the  $^1\text{H}$  NMR spectrum in DMSO- $d_6$ , where the compounds were detected in approximately 0.37 : 0.25 : 0.39 ratio. The mother liquor was left in a beaker to evaporate, which afforded more of the precipitate. This secondary precipitate (0.860 g) consisted of bright-yellow powder, small yellow crystals, and pink-red crystals. The secondary mother liquor was also placed in a beaker and allowed to evaporate. This produced more yellow crystals and some thin red needle-like crystals. In summary, this route afforded considerable if incomplete conversion of YNC into RNC, (7-8). At this stage it is difficult to say whether the conversion ratio from yellow to red complex is a result of chemical equilibrium or a slow kinetics of oxidation. Indirect evidence indicates that the latter is more probable. A quantitative separation of RNC from YNC has not been carried out, but an obvious way of achieving this would be to exploit the

<sup>3</sup> ACS reagent, 30 wt. % in water.

difference in solubility of two complexes in mildly polar solvents, such as  $\text{CHCl}_3$ ,  $\text{EtOEt}$ ,  $\text{EtOAc}$ , or  $\text{CH}_2\text{Cl}_2$  (YNC is a salt with anionic Ni-core, while RNC is a neutral complex). To the secondary precipitate was added water and the mixture brought to the boil with stirring. The remaining precipitate was filtered off and mother liquor extracted with ethyl acetate (60 mL). While the aqueous phase remained delicate yellow, the organic phase turned raspberry-pink. Separation and evaporation of the organic phase produced a solid containing two crystalline materials – well shaped yellow prisms and small clusters of red prisms. Combined yield: about 40 % (an estimate based on the relative intensity of NMR signals in the reaction mixture).

**Route B:** To a honey-yellow solution of complex (6) (0.6342 g, 0.8991 mmol) in dry methanol (40 mL) was added  $\text{H}_2\text{O}_2$  (aq, 511  $\mu\text{L}$ , 5.00 mmol) with no visible change observed. The solution was left stirring in a stoppered flask for two months. The resulting red mixture was allowed to evaporate in a beaker, which produced a mixture of orange-yellow and wine-red crystals (0.487 g). The latter were fused and impossible to separate mechanically. The solid phase was washed with water (40 mL), the residual solid filtered off and allowed to dry in the air. Under the microscope it consisted of bright yellow powder, pale-yellow fused crystals and pale-red fused crystals. Another portion of water (50 mL) was added to the above solid (0.442 g) and the mixture heated with stirring. This afforded an orange solution and residual yellow precipitate. The former was extracted with ethyl acetate (50 mL). The organic phase, which contained the bulk of RNC was allowed to evaporate in a beaker. This produced long thin red crystal ribbons as well as small red prisms, small orange prisms, and very small yellow prisms. Analysis of the red material confirmed it as RNC. Another sample rich in RNC was treated with chloroform, the undissolved residual L2 and YNC filtered off, and the mother liquor left in a small beaker covered with a lid with a pinhole in it for slow evaporation. This produced nearly pure RNC, which crystallised as wonderfully long thin raspberry swords (ca. 0.2 mm  $\times$  0.2 mm  $\times$  25 mm). Besides chloroform, this complex was crystallised in a similar shape out of ethyl acetate, methanol, acetonitrile, and dimethyl sulfoxide. Combined yield: between 21 and 25 % (an estimate based on the NMR data).

For this novel complex we have recorded 1D ( $^1\text{H}$ ,  $^{13}\text{C}$  and  $^{15}\text{N}$ ) and 2D correlation (COSY, HSQC, HMBC ( $^1\text{H}$ - $^{13}\text{C}$ ), HMBC ( $^1\text{H}$ - $^{15}\text{N}$ ) spectra in both  $\text{CDCl}_3$  and  $\text{DMSO-d}_6$  solvents, which were sufficient for complete assignment of chemical shifts.

$^1\text{H}$  NMR ( $\text{CDCl}_3$ / ppm): 2.04 (s, 6H,  $\text{CH}_3$ ), 5.44 (t, 1H,  $J = 6.5$  Hz,  $\text{CHCHCH}$ ), 7.77 (d, 2H,  $J = 6.5$  Hz, NCH), 18.24 (s, 1H,  $\text{O}\cdots\text{H-O}$ ).

$^{13}\text{C}$  NMR ( $\text{CDCl}_3$ / ppm): 10.65 (q,  $\text{CH}_3$ ), 100.63 (t,  $\text{CHCHCH}$ ), 148.27 (s,  $\text{C(=N-O)}$ ), 152.67 (d, NCH), 171.64 (s,  $\text{C(=O)}$ ).

$^1\text{H}$  NMR ( $\text{DMSO-d}_6$ / ppm): 1.92 (s, 6H,  $\text{CH}_3$ ), 5.57 (t, 1H,  $J = 6.2$  Hz,  $\text{CHCHCH}$ ), 7.75 (d, 2H,  $J = 6.2$  Hz, NCH), 18.20 (s, 1H,  $\text{O}\cdots\text{H-O}$ ).

$^{13}\text{C}$  NMR ( $\text{DMSO-d}_6$ / ppm): 10.84 (q,  $\text{CH}_3$ ), 101.39 (t,  $\text{CHCHCH}$ ), 148.47 (s,  $\text{C(=N-O)}$ ), 153.33 (d, NCH), 171.57 (s,  $\text{C(=O)}$ ).

**MS-ToF** [ES $^+$ ] **m/z**: Calculated for  $\text{C}_{18}\text{H}_{20}\text{N}_8\text{O}_8^{58}\text{Ni}_2\text{Na} \equiv [\text{M}_2\text{Na}]^+ 615.0009$ ; found 615.0005;  $\delta$  -0.7 ppm. Mass-spectroscopic data indicate that this complex is present in the gas phase as a monocationic dimer of the neutral Ni(II) complex of oxidised ligand L2' with the charge provided by the inclusion of a sodium cation. Spectral lines corresponding to complexes of various Ni isotopes, namely,  $^{58}\text{Ni}_2$ ,  $^{58}\text{Ni}^{60}\text{Ni}$ ,  $^{58}\text{Ni}^{61}\text{Ni}$ ,  $^{58}\text{Ni}^{62}\text{Ni}$ ,  $^{58}\text{Ni}^{64}\text{Ni}$ , and  $^{60}\text{Ni}_2$ , were observed at intensities consistent with the abundance of these isotopes.

## Structure Refinement

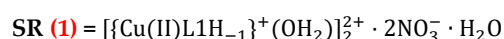

Hydrogen atom linked to the oxime group was localized in the Fourier difference map and freely refined. Hydrogen atoms linked to the coordinated water molecule were localized in the Fourier difference map and introduced in the calculation using the AFIX 7 instruction for regular geometry. Hydrogen atoms linked to the not coordinated water molecule were not localized in the Fourier difference map and not introduced in the calculation.

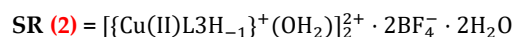

Hydrogen atoms linked to the oxime group and to the water molecules were localized in the Fourier difference map and freely refined. The anion is affected by rotational disorder; three of its fluorine atoms were found spread over two positions, each one treated with fixed 0.5 population parameter.

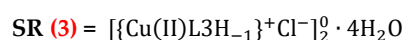

Hydrogen atom linked to the oxime group was localized in the Fourier difference map and freely refined. Hydrogen atoms linked to the water molecules were localized in the Fourier difference map and introduced in the calculation using the AFIX 7 instruction for regular geometry.

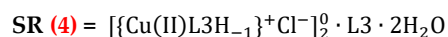

Hydrogen atoms linked to the oxime group were localized in the Fourier difference map and introduced in the calculation. One of them was freely refined, while the other one (H1) was constrained to be 0.9 Å apart from the linked oxime oxygen (O1). Hydrogen atoms linked to the water molecule were localized in the Fourier difference map and introduced in the calculation using the AFIX 7 instruction for regular geometry.

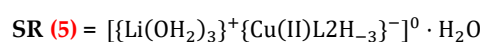

Hydrogen atom linked to the oxime group was localized in the Fourier difference map and freely refined. Hydrogen atoms linked to the water molecules were localized in the Fourier difference map and introduced in the calculation using the AFIX 7 instruction for regular geometry.

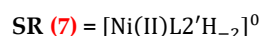

The compound crystallizes in the acentric monoclinic space group Cc. The correct assignment of the space group, i.e. the lack of proper 2-fold axes and of the consequently generated inversion centres, was verified by careful inspection of the crystal packing.

Hydrogen atom linked to the oxime group was localized in the Fourier difference map and freely refined. Hydrogen atoms linked to the water molecules were localized in the Fourier difference map and introduced in the calculation using the AFIX 7 instruction for regular geometry.

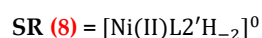

Hydrogen atoms linked to the oxime group were localized in the Fourier difference map and freely refined.
